1 **Calcium-dependent protein kinase 5 links calcium-signaling with *SARD1*-dependent**  
2 **immune memory in systemic acquired resistance**

3

4 Tiziana Guerra<sup>1,2</sup>, Silke Schilling<sup>1</sup>, Fabian-Philipp Sylvester<sup>1</sup>, Benjamin Conrads<sup>1,2</sup>, and Tina  
5 Romeis<sup>1,3</sup>

6

7 <sup>1</sup>Department of Plant Biochemistry, Dahlem Centre of Plant Sciences, Institute for Biology,  
8 Freie Universität Berlin, 14195 Berlin, Germany;

9 <sup>2</sup>present address: Leibniz Institute of Vegetable and Ornamental Crops, 14979 Großbeeren,  
10 Germany;

11 <sup>3</sup>present address: Leibniz Institute of Plant Biochemistry, 06120 Halle (Saale), Germany.

12

13 Author for correspondence: Tina Romeis, Tel: +49 345 5582 1400, Email: [tina.romeis@ipb-](mailto:tina.romeis@ipb-)  
14 [halle.de](mailto:tina.romeis@ipb-halle.de)

15

## 16 **Summary**

17 - Systemic acquired resistance (SAR) prepares infected plants for faster and stronger  
18 defense activation upon subsequent attacks. SAR requires an information relay from primary  
19 infection to distal tissue and the initiation and maintenance of a self-maintaining  
20 phytohormone salicylic acid (SA)-defense loop.

21 - In spatial and temporal resolution we show that calcium-dependent protein kinase CPK5  
22 contributes to immunity and SAR. In local basal resistance CPK5 functions upstream of SA-  
23 synthesis, -perception, and -signaling. In systemic tissue, enhanced CPK5 signaling leads to  
24 an accumulation of SAR marker genes including transcription factor *Systemic Acquired*  
25 *Resistance Deficient 1 (SARD1)*.

26 - Plants of enhanced CPK5-, but not CPK6-, signaling display a 'super-priming' phenotype of  
27 enhanced resistance toward a secondary bacterial infection. In *sard1* background, CPK5-  
28 mediated basal resistance is still mounted but systemic 'super-priming' is lost.

29 - The biochemical analysis determines CPK5 half maximal kinase activity for calcium K50  
30  $[Ca^{2+}]$  to ~100 nM close to the cytoplasmic resting level. This low activation threshold  
31 uniquely qualifies CPK5 to decode subtle changes in calcium prerequisite to immune signal  
32 relay and to onset and maintenance of priming at later time points in distal tissue. Our data  
33 explain why CPK5 functions as a hub in basal and systemic plant immunity.

34

## 35 **Key words**

36 Calcium-dependent protein kinase 5, calcium-signaling, immune memory, SARD1, systemic  
37 acquired resistance

38

## 39 **Introduction**

40 Rapid and long-term activation of the plant immune system guarantees plant survival upon  
41 pathogen infection. Pathogen recognition initiates early intracellular responses at the local  
42 infection site, which involve changes in ion fluxes inclusive an increase of the cytoplasmic  
43 calcium concentration, recruitment of signaling cascades and the activation of transcriptional  
44 reprogramming. The information of local 'having been attacked' is subsequently relayed to  
45 distal plant parts. On the basis of phytohormone-mediated transcriptional and metabolic  
46 changes, resistance to the attacking pathogen is manifested in the entire plant. The plant  
47 may establish and maintain systemic acquired resistance (SAR) and thus prime an immune  
48 memory of 'being prepared to defend upon a subsequent attack' (Hake & Romeis, 2018).

49 During defense initiation, a microbial pathogen is recognized at the site of infection via non-  
50 species specific Pathogen-Associated Molecular Patterns (PAMPs). PAMPs bind as ligands  
51 to specific receptors (Pattern Recognition Receptors (PRRs)), intracellular defense  
52 responses become activated and PAMP-triggered immunity (PTI) is established. In a

53 species-specific context, a second layer of defense, Effector-Triggered Immunity (ETI), has  
54 evolved to detect PTI-suppressing effectors from adapted pathogens. In ETI defense  
55 response activation occurs either directly upon effector binding, or indirectly by the  
56 recognition of a process of effector target modification. ETI triggers a stronger more long-  
57 term response and hypersensitive cell death reaction. Also, ETI may result in 'priming' of  
58 SAR rendering a plant prepared for repeated infection after a time gap. Primed plants show  
59 more rapid and stronger activation of defense responses upon a secondary infection even by  
60 unrelated pathogens (Conrath, 2006; Hilker *et al.*, 2015; Hake & Romeis, 2018).

61 Both, local and systemic resistance depend on the synthesis, accumulation, and downstream  
62 signaling of the phenolic phytohormone salicylic acid (SA). SA biosynthesis is catalyzed by  
63 ISOCHORISMATE SYNTHASE 1 (ICS1) and SA transport from the chloroplast to the  
64 cytoplasm is mediated by ENHANCED DISEASE SUSCEPTIBILITY 5 (EDS5) (Wildermuth *et al.*,  
65 2001; Serrano *et al.*, 2013). SA-dependent responses were shown to be under the  
66 control of PHYTOALEXIN DEFICIENT 4 (PAD4). PAD4, in concerted action with a lipase-like  
67 protein, ENHANCED DISEASE SUSCEPTIBILITY 1 (EDS1), is required for the expression of  
68 multiple defense responses in basal defense in PTI and ETI as well as for ETI-associated  
69 hypersensitive response leading to systemic resistance (Glazebrook *et al.*, 1997; Wiermer *et al.*,  
70 2005; Rietz *et al.*, 2011). SA is perceived by NON-EXPRESSOR OF PATHOGENESIS-  
71 RELATED GENES 1 (NPR1) as one of three known SA-receptors (Fu *et al.*, 2012; Wu *et al.*,  
72 2012; Yan & Dong, 2014; Manohar *et al.*, 2015; Y. Ding *et al.*, 2018). Continuous SA-  
73 signaling will thus impact on changes in histone modification, in gene expression, and in  
74 metabolite production and lead to persistent plant resistance to pathogens.

75 This genetic framework subsequent to local pathogen attack in SA-mediated plant resistance  
76 is well characterized. Yet little is known about the switch into prolonged systemic continuous  
77 SA signaling and the establishment of SAR, a decision which comes for a plant along with a  
78 cost on development and severe growth retardation (Hake & Romeis, 2018).

79 The nature of plant signals that bear the information of 'having been attacked' from local  
80 infection sites to distal tissues is an ongoing matter of debate. Several metabolites have  
81 been described, whose requirement for distal SA accumulation and SAR have been proven,  
82 including non-proteinaceous amino acid pipecolic acid (Pip) (Návarová *et al.*, 2012) and most  
83 recently N-hydroxypipecolic acid (NHP) (Hartmann *et al.*, 2018). Pip has been recognized as  
84 a most prominent signal molecule and marker for SAR. It is synthesized 12 h post pathogen  
85 infection from L-Lys through enzymes AGD2-LIKE DEFENSE RESPONSE PROTEIN 1  
86 (ALD1) and SAR-DEFICIENT 4 (SARD4) (Bernsdorff *et al.*, 2016; P. Ding *et al.*, 2016;  
87 Hartmann *et al.*, 2017). Pip is further modified through FLAVIN-DEPENDENT  
88 MONOOXYGENASE 1 (FMO1) to generate NHP. Remarkably, Pip enforces a prolonged SA

89 biosynthesis in systemic plant tissue in an *ALD1/FMO1/ICS1* positive feed-forward loop  
90 during SAR.

91 The manifestation of SAR requires key transcriptional regulator SYSTEMIC ACQUIRED  
92 RESISTANCE DEFICIENT 1 (SARD1) which is induced late after a priming pathogen attack  
93 (Wang *et al.*, 2009; Truman & Glazebrook, 2012; Sun *et al.*, 2015). In distal plant tissue  
94 SARD1 mediates continuous SA and Pip synthesis. *sard1* mutants no longer establish SAR  
95 (Zhang *et al.*, 2010; Wang *et al.*, 2011) and thus lack the memory of 'having been attacked'.  
96 Calcium-Dependent Protein Kinases (CDPKs, in *Arabidopsis thaliana*: CPKs) are calcium-  
97 sensor - protein kinase effector proteins in a single molecule. Upon calcium binding, a  
98 consensus enzyme with four EF-hand calcium-binding motifs undergoes a conformational  
99 change, adopts a kinase-active state and thus phosphorylates target proteins (Cheng *et al.*,  
100 2002; Liese & Romeis, 2013; Schulz *et al.*, 2013). CDPKs have consequently been  
101 discussed as decoders of changes in the cytoplasmic calcium concentration [ $Ca^{2+}$ ].  
102 Accordingly, CDPKs were identified as positive regulators during the initiation of immune  
103 signaling, triggering local immune responses in PTI and ETI, and contributing to basal  
104 resistance (Kobayashi *et al.*, 2007; Boudsocq *et al.*, 2010; Kobayashi *et al.*, 2012; Dubiella *et al.*,  
105 2013; Gao *et al.*, 2013; Gao & He, 2013). A negative regulatory role in immune signal  
106 initiation was demonstrated for CPK28 (Monaghan *et al.*, 2014; Monaghan *et al.*, 2015; J.  
107 Wang *et al.*, 2018).

108 Furthermore, CDPKs are implicated in the relay of an immune signal from local to distal sites.  
109 In particular, *Arabidopsis* CPK5 has been implicated to drive a calcium- and ROS-based  
110 auto-propagating signaling loop, which contributes to signal propagation from a local  
111 infection site to un-infected foliar tissue of a plant in PTI (Dubiella *et al.*, 2013; Seybold *et al.*,  
112 2014; Hake & Romeis, 2018).

113 However, a specific requirement of calcium signal decoding during the manifestation of SAR  
114 in systemic plant tissue at later time points after a primary local pathogen attack is unknown.  
115 Plants overexpressing CPK5-YFP show constitutive CPK5 enzyme activity. Enhanced  
116 CPK5–signaling leads to constitutive defense responses and increased SA-dependent  
117 disease resistance in these plants (Dubiella *et al.*, 2013). Independently, several alleles of  
118 *cpk5* have been identified in a forward genetic screen as suppressors of the autoimmune  
119 mutant *exo70B1* characterized by its resistance to multiple bacterial and fungal pathogens.  
120 *exo70B1* plants display constitutive SA-dependent defense responses reminiscent to those  
121 of enhanced CPK5-signaling. Resistance depends on the atypical immune receptor TN2, and  
122 TN2 protein interacts with CPK5 stabilizing the enzyme in a kinase-active state (Liu *et al.*,  
123 2017). Taken together, these data suggest that CPK5 contributes to the control of long-term  
124 systemic resistance and SAR.

125 Here, we address in temporal and spatial resolution the role of CPK5 as a calcium-regulated  
126 key component for signaling in systemic resistance. CPK5 functions upstream of the SA  
127 signaling cascade comprised by *ICS1*, *EDS5*, and *NPR1* as well as by *PAD4*, and mediates  
128 *ALD1*- and *FMO1*-dependent immune responses in basal and systemic resistance.  
129 Furthermore, enhanced CPK5 signaling, but not CPK6 signaling, causes an increase in SAR  
130 at late time points in distal tissue, and this 'super-priming' requires *SARD1*. *sard1* mutant  
131 plants still display CPK5-mediated enhanced basal resistance but lack the memory phase to  
132 gain 'super-priming'. CPK5 is capable of responding to even subtle calcium changes due to  
133 its low biochemical  $K_{50}$  for calcium at ~100 nM. This feature qualifies predominantly CPK5  
134 over CPK6 an ideal component in signal propagation and in the systemic control of defense  
135 manifestation through a switch in *SARD1*-dependent SAR.

136

## 137 **Material and Methods**

138

### 139 **Plant materials and growth conditions**

140 *Arabidopsis thaliana* Col-0 wild type, mutants, CPK5- and CPK6-overexpressing lines and  
141 derived crosses were grown under short day conditions (8 h light per 16 h dark cycle) at  
142 20°C, 60% relative humidity. The mutant plants represent *cpk5* (SAIL\_657C06) and *cpk6*  
143 (SALK\_025460C). *CPK5-YFP#7* was crossed to *ics1* (SALK\_088254), *npr1-1* (N3726), *pad4*  
144 (SALK\_089936), *eds5* (SALK\_091541C), *sard1-1* (SALK\_138476C), *ald1* (SALK\_007673),  
145 and *fmo1* (SALK\_026163) and subsequently genotyped in filial generations. Primers used for  
146 genotyping are listed in Supplementary Table 1. Plant lines *ics1*, *pad4*, *eds5*, and *sard1* were  
147 obtained from the Nottingham Arabidopsis Stock Centre (NASC), *npr1-1* was kindly provided  
148 by C. Gatz (University Göttingen, Germany), *ald1* and *fmo1* were kindly provided by J. Zeier  
149 (University Düsseldorf, Germany). *CPK5-YFP#7* and CPK5mut-YFP #15 (expressing a  
150 kinase-deficient variant of CPK5) have been described previously (Dubiella *et al.*, 2013).

151

### 152 **Generation of CPK6-YFP overexpressing line**

153 The coding region of full-length CPK6 (AT2G17290) was amplified from Col-0 cDNA with  
154 primers CPK6-YFP-LP and CPK6-YFP-RP. The 1636 bp CPK6 fragment was cloned into the  
155 pENTR D/TOPO vector (Invitrogen) and confirmed by sequencing. The C-terminal YFP-  
156 fusion construct was generated by LR-Gateway recombination into pXCSG-YFP. Transgenic  
157 *Arabidopsis* plants were generated by the floral dip method. The flowering *Arabidopsis*  
158 *thaliana* Col-0 plants were dipped into *Agrobacterium tumefaciens* GV3101 pMP90RK  
159 carrying pXCSG-CPK6-YFP. Seeds were harvested and selected for BASTA-resistance to  
160 gain independent transformants.

161

## 162 **Generation of CPK5-StrepII, CPK6-StrepII and CPK5-YFP-StrepII constructs**

163 The C-terminal CPK6 StrepII-fusion construct was generated by using the pENTR D/TOPO  
164 CPK6 vector via LR-Gateway recombination into pXCSG-StrepII. The coding region of full-  
165 length CPK5 (AT4G35310) and CPK6 were amplified from pXCSG-CPK5-StrepII, pXCS-  
166 CPK5-YFP (Dubiella *et al.*, 2013) and pXCSG-CPK6-StrepII with primers CPK5-StrepII-LP  
167 and CPK5-StrepII-RP, primers CPK5-YFP-StrepII-LP and CPK5-YFP-StrepII-RP, and CPK6-  
168 StrepII-LP and CPK6-StrepII-RP, respectively. The 1749 bp CPK5-StrepII and 1707 bp  
169 CPK6-StrepII fragments were cloned into pET30 expression vector derivate (Novagen,  
170 Merck) denominated pET30-CTH (Glinski *et al.*, 2003) via *NdeI* and *XhoI* restriction sites to  
171 replace His-tag. To generate pET30-CPK5-YFP-StrepII a fragment encompassing 264 bp of  
172 CPK5 (C-terminal part) plus 720 bp YFP was cloned into pET30-CPK5-StrepII using the  
173 internal restrictions sites *MfeI* and *BsaI*.

174

## 175 **Gene expression analysis by RT-qPCR**

176 To analyze transcript levels RNA was extracted from leaf tissue using the TRIzol method  
177 (ThermoFisher). 2 µg of RNA was incubated with RNase-free DNase (Fermentas) and  
178 subjected to reverse transcription using SuperscriptIII SuperMix (ThermoFisher) according to  
179 the manufacturer's protocols. Real-time quantitative PCR analysis was performed in a final  
180 volume of 10 µl according to the instructions of Power SYBR Green PCR Master Mix  
181 (Applied Biosystems) using the CFX96 system (Bio-Rad). Amplification specificity was  
182 evaluated by post-amplification dissociation curves. *ACTIN2* (At3g18780) was used as the  
183 internal control for quantification of gene expression. Primer sequences are listed in Table  
184 S2.

185

## 186 **Protein expression and purification**

187 The expression vector pET30 containing CPK5-YFP-StrepII, CPK5-StrepII or CPK6-StrepII  
188 was introduced in *E. coli* BL21 (DE3) (Stratagene) strain. Bacteria were grown at 37 °C in LB  
189 media containing 50 µg/ml kanamycin and protein expression was induced at OD<sub>600</sub> 0.5-0.8  
190 with 0.3 mM isopropylthiol-β-galactoside (IPTG) and incubated for an additional 2-2.5 h at 28  
191 °C. Cells were harvested by centrifugation. Cells were lysed in lysis buffer (100 mM TRIS pH  
192 8.0, 150 mM NaCl, 20 mM DTT, 100 µg/ml Avidin and 50 µl protease inhibitor cocktail for  
193 histidine tagged proteins per 1 g *E. coli*) by incubation for 20 minutes with 1 mg/ml Lysozyme  
194 and additional sonification. Cell debris was removed by centrifugation. The supernatant was  
195 loaded on self-packed columns containing 1 ml Strep-Tactin-Macroprep (50% suspension,  
196 IBA) equilibrated with wash buffer (100 mM TRIS pH 8.0, 150 mM NaCl). Flow-through was  
197 loaded on columns three times. After washing columns with 3 ml wash buffer, proteins were  
198 eluted with 3x 500 µl elution buffer (100 mM TRIS pH 8.0, 150 mM NaCl, 2 mM d-

199 Desthiobiotin). Protein purity and concentration were analyzed via Bradford (Protein assay,  
200 Bio-Rad) and 10 % SDS-PAGE and Coomassie staining.

201

### 202 ***In vitro* kinase assay**

203 *In vitro* kinase assay was performed with StrepII-tag affinity purified recombinant CPK5-  
204 variants and CPK6 with substrate peptides Syntide 2 or RBOHD (aa 141-150, encompassing  
205 S148: RELRRVFSRR). The final kinase reaction (30  $\mu$ l) contained ~25 nM CPK5-variants or  
206 CPK6 in a volume of 5  $\mu$ l and either 20  $\mu$ l buffer E (50 mM TRIS-HCl pH 8.0, 2 mM DTT, 0.1  
207 mM EDTA) and 5  $\mu$ l reaction buffer (60 mM MgCl<sub>2</sub>, 60  $\mu$ M RBOHD S148 or 60  $\mu$ M Syntide 2,  
208 60  $\mu$ M ATP, 3  $\mu$ Ci [ $\gamma$ -<sup>32</sup>P] ATP, 0.2 x buffer E, 30  $\mu$ M CaCl<sub>2</sub> or 12 mM EGTA) for time course  
209 analysis or 20  $\mu$ l calcium buffer (30 mM TRIS pH 8.0, 10 mM EGTA, 150 mM NaCl and  
210 different concentrations of CaCl<sub>2</sub> as indicated) and 5  $\mu$ l reaction buffer without additional  
211 CaCl<sub>2</sub> or EGTA for K50 determination. The reaction was either incubated for 20 minutes at  
212 22°C for K50 determination or as indicated for time course analysis. The reaction was  
213 stopped by adding 3  $\mu$ l 10 % phosphoric acid. Radioactive labeled phosphorylation of  
214 peptides was determined by the P81 filter-binding method as described (Romeis *et al.*  
215 (2000)). Kinase activities are plotted against the Ca<sup>2+</sup> concentration using graph GraphPad  
216 Prism 4 software (GraphPad Software) in a four parameter logistic equation. Relative kinase  
217 activities in percentage are fitted by a four parameter logistic equation with the top fixed to  
218 100% constant value using graph GraphPad Prism 4.

219

### 220 **In-gel kinase assay**

221 Phosphorylation events were monitored in unstressed *Arabidopsis* two-week-old seedlings  
222 as described previously (Dubiella *et al.*, 2013). Seedlings were grown on 0.5 MS + 1%  
223 sucrose for 2 weeks and harvested in pools of 200 mg and directly frozen in liquid nitrogen.

224

### 225 **Bacterial growth *in planta***

226 To quantify bacterial growth in *Arabidopsis*, six-week-old plants grown on soil under short  
227 day conditions were used. The different *Pseudomonas syringae* strains were grown in King's  
228 B media overnight at 28°C in a shaker at 200 rpm. The cells were harvested by centrifugation  
229 at 4°C for 15 min at 2,000xg and washed twice with 10 mM MgCl<sub>2</sub>. Cells were resuspended in 10  
230 mM MgCl<sub>2</sub> to a concentration of 10<sup>4</sup> cfu/ml used for infiltration into the leaf. For basal  
231 resistance *Pseudomonas syringae* pv. *tomato* DC3000 was used. In the case of SAR  
232 experiments, the primary infection and treatment with either bacterial suspension at OD<sub>600</sub>  
233 0.005 (avirulent *Pseudomonas syringae* pv. *maculicola* ES4326 avr *Rpm1*) or the control of  
234 10 mM MgCl<sub>2</sub> were conducted for two days in three fully developed 'primary' leaves, which  
235 were cut 24 h after infiltrations. For the secondary infection the virulent strain *Pseudomonas*

236 *syringae* pv. *maculicola* ES4326 was used. Samples were harvested at day 0 and day 3 post  
237 (the secondary) infection. Per *Arabidopsis* line at least 8 plants were inoculated. For the  
238 analysis of systemic signal propagation, six-week-old *Arabidopsis* plants were used.  
239 Experiments were performed as described previously (Dubiella *et al.*, 2013).

240

#### 241 **Gas chromatographic analysis of amino acid derivatives**

242 The analysis was performed as described by Návarová *et al.* (2012). Statistical analysis was  
243 done using student's t-test.

244

#### 245 **Accession numbers**

246 Sequence data from this article can be found in the Arabidopsis Information Resource or  
247 GenBank/EMBL databases under the following accession numbers: *CPK5* (AT4G35310),  
248 *CPK6* (AT2G17290), *ICS1* (AT1G74710), *NPR1* (AT1G64280), *PAD4* (AT3G52430), *EDS5*  
249 (AT4G39030), *SARD1* (AT1G73805), *ALD1* (AT2G13810), *FMO1* (AT1G19250).

250

#### 251 **Results**

252

#### 253 **SA biosynthesis and signaling are required for CPK5-mediated defense marker gene** 254 **expression and enhanced pathogen resistance**

255 To address whether SA synthesis and SA signaling are required for CPK5-mediated  
256 enhanced resistance to bacterial pathogens we performed crosses between the CPK5-  
257 overexpressing line *CPK5-YFP#7* and defense mutants *ics1*, *eds5*, *npr1-1*, *pad4*, and *sard1*.  
258 The phenotypic analysis revealed that reduced rosette diameter, necrosis, and crinkled  
259 leaves, which are attributed to enhanced CPK5-activity in line #7, are no longer evident in  
260 crossing lines in the absence of SA biosynthesis (*ics1*), transport (*eds5*) or signaling (*npr1*)  
261 (Fig. **1a**). This phenotypic reversion is corroborated by the expression of *PR1*, indicative for  
262 SA signaling, and *FRK1*, an flg22-responsive marker gene. *CPK5-YFP#7* is characterized by  
263 constitutive high levels of *PR1* and *FRK1* (Dubiella *et al.*, 2013), whose basal gene  
264 expression is reverted to Col-0 levels in the crossing lines (Fig. **1b**). Accordingly, in pathogen  
265 growth assays with the virulent pathogen *Pseudomonas syringae* pv. *tomato* (*Pst*) DC3000  
266 enhanced bacterial resistance indicative for *CPK5-YFP#7* is compromised, and crossing  
267 lines show either bacterial counts as the Col-0 wild type (x *npr1*) or become even more  
268 susceptible than Col-0 (x *ics1*, x *eds5*) (Fig. **1c**). The expression and presence of active  
269 CPK5-YFP protein kinase was confirmed by western blot and in-gel kinase assay as  
270 exemplarily shown for crossing lines to *ics1* and *npr1* (Fig. **S1a,b**). These data indicate that  
271 SA biosynthesis and SA downstream signaling are predominantly responsible for CPK5-  
272 mediated defense reactions.



273 Likewise, *PAD4*, a key component and positive regulator of defense responses in the context  
274 of ETI upon activation of TIR-NB-LRR proteins, is required for CPK5-dependent and SA-  
275 mediated bacterial resistance. In line *pad4* x *CPK5-YFP#7*, the plant rosette diameter,  
276 defense marker gene expression, and pathogen growth are reverted to Col-0 phenotypes  
277 (Fig. 1). The crossing line *edr1* x *CPK5-YFP#7* shows reduced *PR1* and *FRK1* defense  
278 expression compared to *CPK5-YFP#7*, but still elevated compared to Col-0, and retains its  
279 increased higher basal resistance, accompanied by the phenotype of a small plant rosette  
280 and the development of necrosis symptoms. Compared to an increased susceptibility of *ics1*  
281 and *npr1* single mutants crossing lines show a certain benefit of enhanced CPK5-signaling  
282 resulting in less bacterial growth (Fig. 1b). These data hint toward an additional contribution  
283 of CPK5-triggered defense activation independent of *ICS1* and *NPR1*.

284

### 285 **The expression of SAR marker genes depends on CPK5**

286 We next assessed SAR marker gene expression *ALD1* and *FMO1* in a temporally and  
287 spatially defined manner using a modified systemic signaling assay. Three local (proximal)  
288 leaves were stimulated by either mock- (10 mM MgCl<sub>2</sub>) or 200 nM flg22-infiltration. Samples  
289 of systemic tissue were harvested two days after the local infiltration (2 dpi) and gene  
290 expression was monitored via RT-qPCR. Enhanced CPK5 signaling in *CPK5-YFP#7* resulted  
291 in high constitutive *ALD1* and *FMO1* expression, irrespectively of a mock or flg22 treatment  
292 (Fig. 2a). Likewise, *NHL10*, a marker gene for rapid CPK5-dependent defense signal  
293 propagation, is constitutively expressed in systemic tissue. In contrast, Col-0 and *CPK6-*  
294 *YFP#23* do not display elevated SAR marker gene expression. Single mutant lines of *cpk5*  
295 more than of *cpk6* show some reduction in basal and systemic *ALD1*, *FMO1* and *NHL10*  
296 expression at 2 dpi even after the local flg22 stimulus (Fig. 2b). These data corroborate a  
297 specific role of CPK5 over CPK6 in the regulation of temporal late and spatially distal  
298 expression of defense genes.

299

### 300 **CPK5 contributes to priming**

301 To address whether the observed constitutive *ALD1* gene expression correlates with SAR  
302 marker metabolite Pip accumulation we determined Pip levels by gas chromatography-mass  
303 spectrometry (GC-MS) analysis in Col-0 and *CPK5-YFP#7* plants. A statistically significant  
304 accumulation of Pip was measured in CPK5-overexpressing lines in the absence of  
305 pathogen exposure (Fig. S2).

306 Next, we conducted SAR bacterial growth assays where plants were exposed to a priming  
307 infection with avirulent *Pseudomonas syringae* pv. *maculicola* ES 4326 *avrRpm1* (*Psm*  
308 *avrRpm1*) in local (proximal) leaves, followed two days later by a triggering infection with  
309 virulent *Psm* ES 4326 in distal leaves (Fig. 3 and scheme in Fig. S3). The reported benefit of

310 priming as reduced bacterial growth upon a secondary infection is observed in Col-0 plants  
311 (Fig. 3, Fig. 4d, Fig. 5b) (Durrant & Dong, 2004; Mishina & Zeier, 2006; Fu & Dong, 2013;  
312 Gruner *et al.*, 2013; Shah & Zeier, 2013). CPK5 overexpression leads to an overall increased  
313 resistance towards bacterial pathogens due to CPK5-mediated, SA-dependent enhanced  
314 basal resistance (Dubiella *et al.*, 2013) (Fig. 1c, Fig. 3b, Fig. 4c,d, Fig. 5b). Interestingly, this  
315 basal level of CPK5-mediated resistance, already seen upon infection with the virulent strain,  
316 mimics the SAR level in primed Col-0 plants. Remarkably, when *CPK5-YFP#7* is subjected  
317 to a combination of priming and triggering infections, a status of hyper-resistance ('super-  
318 priming') is observed (Fig. 3b, Fig. 4d, Fig. 5b). No alteration in priming capacity compared  
319 to Col-0 is observed in plants overexpressing CPK6 (*CPK6-YFP#23*) (Fig. 3d). A loss of  
320 priming capability is observed in *cpk5 cpk6* double mutant lines (Fig. 3e), whereas no  
321 statistically significant reduction of priming occurs in respective *cpk5* and *cpk6* single mutant  
322 lines (Fig. 3a,c,e). These data are consistent with previous reports in which single *cpk*  
323 mutants did not show compromised resistance to infections with virulent bacterial pathogens  
324 (Boudsocq *et al.*, 2010).

325

### 326 **CPK5-mediated priming is dependent on *ALD1/FMO1*-signaling**

327 We next generated crosses between *ald1* and *fmo1* mutant lines, respectively, and *CPK5-*  
328 *YFP#7* and double homozygous plants were selected. Both crosses, *ald1* x *CPK5-YFP#7*  
329 and *fmo1* x *CPK5-YFP#7*, no longer show the reduced growth phenotype manifested in a  
330 smaller rosette, disordered leaf shape and lesion development caused by CPK5-YFP  
331 overexpression (Fig. 4a). Also, basal expression of marker genes *ICS1* and *NHL10*, both  
332 elevated in *CPK5-YFP#7*, are reverted to Col-0 wild type level in the crosses (Fig. 4b).

333 In standard bacterial growth assays using *Pst* DC3000 both single mutant lines, *ald1* and  
334 *fmo1*, are more susceptible to bacterial pathogens compared to wild type. In crosses, the  
335 enhanced resistance of *CPK5-YFP#7* is lost. Thus bacterial growth in *ald1* x *CPK5-YFP#7* is  
336 reverted to Col-0 wild type level and in *fmo1* x *CPK5-YFP#7* bacterial growth resembles that  
337 of the *fmo1* single mutant (Fig. 4c). These data demonstrate that full CPK5-mediated  
338 resistance depends on *ALD1* and *FMO1*.

339 To address the dependency of CPK5-mediated SAR on *ALD1* and *FMO1*, priming  
340 experiments were conducted in temporal and special resolution as described above. Priming  
341 as observed in Col-0 and the 'super-priming' phenotype of *CPK5-YFP#7* was entirely absent  
342 in *ald1* x *CPK5-YFP#7* and *fmo1* x *CPK5-YFP#7* (Fig. 4d). Instead, inoculated plants showed  
343 increased susceptibility like un-primed Col-0 or became even more susceptible (*fmo1* x  
344 *CPK5-YFP#7*), consistent with FMO1 enzyme catalyzing the reversion of SAR marker  
345 metabolite Pip to NHP during SAR (Hartmann *et al.*, 2018).

346

### 347 **CPK5-mediated priming depends on *SARD1***

348 We next assessed whether CPK5-mediated ‘super-priming’ requires SAR key transcription  
349 factor *SARD1*. Our expression analysis revealed a high constitutive level of *SARD1* transcript  
350 in line *CPK5-YFP#7* compared to Col-0. *SARD1* transcript accumulation is absent in priming-  
351 deficient crosses *ald1* x *CPK5-YFP#7* and *fmo1* x *CPK5-YFP#7* and also in the *ald1* and  
352 *fmo1* single mutants whereas basal *SARD1* expression is slightly reduced in *cpk5* compared  
353 to Col-0 (Fig. 5a).

354 To investigate whether *SARD1* is required for CPK5-mediated priming or ‘super-priming’, a  
355 cross between *sard1-1* and *CPK5-YFP#7* was generated and double homozygous plants  
356 were analyzed. In the crossed lines, local and systemic *ALD1* and *FMO1* gene expression at  
357 2 dpi, which is constitutively elevated in *CPK5-YFP#7*, is entirely absent (Fig. 5c). The same  
358 is observed for *PR1* and *FRK1* (Fig. 1b). Remarkably, in *sard1-1* x *CPK5-YFP#7* the  
359 systemic *ALD1* and *FMO1* expression is low in unstimulated conditions (resembling Col-0),  
360 but upon flg22-stimulation both gene transcripts accumulate to high levels comparable to  
361 those of the CPK5-overexpressing line. These data correlate with the phenotype of *sard1-1* x  
362 *CPK5-YFP#7* plants, which display a reduced rosette diameter and lesion development  
363 compared to *CPK5-YFP#7* (Fig. 1a), and which also show enhanced resistance to the  
364 virulent bacterial pathogen *Pst* DC3000 (Fig. 1c).

365 Priming experiments for bacterial growth in SAR reveal that *sard1-1* x *CPK5-YFP#7* plants  
366 are still able to repress bacterial growth to the level of the CPK5-overexpression line.  
367 However, in the absence of *SARD1*, these plants are unable to induce ‘super-priming’  
368 observed in the CPK5-overexpressing line (Fig. 5b). Thus, ectopic activation of CPK5  
369 throughout the entire plant induces immunity against bacterial pathogens. Although defense  
370 is already activated by CPK5-YFP in distal leaves, an additional *SARD1*-dependent signal is  
371 relayed. These data suggest that CPK5 signaling mediates both, rapid local and long-term  
372 distal resistance responses, to restrict pathogen growth. *SARD1*, a transcriptional regulator  
373 whose gene itself is induced late during pathogen infection, is required only for the latter.  
374 Whereas in *sard1-1* x *CPK5-YFP#7* CPK5-mediated enhanced basal resistance is unaltered,  
375 plants miss the late additional resistance benefit of having been primed.

376

### 377 **CPK5 is a highly responsive calcium-activated enzyme**

378 The calcium concentration at which a CDPK displays half-maximal phosphorylating kinase  
379 activity,  $K_{50} [Ca^{2+}]$ , reflects an isoform-specific biochemical parameter and differs even  
380 between close homologs within the CDPK gene family. A low  $K_{50}$  for calcium is indicative for  
381 an enzyme that has adopted its catalytically active conformation at low concentrations of  
382 calcium. In standard *in vitro* kinase assays with recombinant enzymes toward synthetic  
383 peptide substrate Syntide 2 the  $K_{50} [Ca^{2+}]$  for CPK5 is as low as ~94 nM and for CPK6 ~186

384 nM (Fig. **6a,c**). The intracellular calcium concentration in unstimulated plants is reported to  
385 ~100 nM (Stael *et al.*, 2012; Costa *et al.*, 2018). Thus, at the resting cytoplasmic calcium  
386 concentration CPK5 but not yet CPK6 activity is already highly responsive to subtle  
387 concentration changes. A likewise low K50 [ $\text{Ca}^{2+}$ ] is observed with peptide substrate  
388 encompassing S148 from the CPK5 *in vivo* phosphorylation target RBOHD (Dubiella *et al.*,  
389 2013; Kadota *et al.*, 2014) (Fig. **6b,d**). Likewise, similar low K50 [ $\text{Ca}^{2+}$ ] is determined for  
390 fusion protein CPK5-YFP for both substrates (Fig. **S5**).

391 Remarkably, the CPK5-YFP fusion protein displays higher kinase activity at low [ $\text{Ca}^{2+}$ ]  
392 concentrations compared to CPK5 in a rapid kinetic assay (Fig. **6e**). This is consistent with  
393 an interpretation that CPK5-YFP undergoes more rapidly (and at lower cytoplasmic calcium  
394 concentrations) a calcium-induced conformational change to adapt and stabilize the active  
395 conformation compared to the native enzyme. In accordance with this analysis CPK5-YFP  
396 transgenic plants display constitutive biochemical (in-gel kinase) activity, and a further  
397 increase in kinase activity was induced upon flg22 treatment of these plants (Dubiella *et al.*,  
398 2013).

399

## 400 **Discussion**

401 Systemic acquired resistance represents a status of preparedness of the entire plant foliage  
402 to a broad spectrum of microbial pathogens induced by a preceding infection at a local site.  
403 This preparedness is corroborated by more rapid and vigorous activation of defense  
404 responses. Because long-term defense activation may come at the cost of growth retardation  
405 and a delay of plant development, the decision to switch in the SAR mode has to be tightly  
406 controlled. SA plays a pivotal role in plant immunity, and SA accumulation is undoubtedly a  
407 key executor to establish and maintain SAR. However, SA is not considered to be the one  
408 and only signal molecule to be transported through the plant. Thus, the switch to SAR  
409 requires an information relay of the 'having been attacked' perception from local to distal  
410 plant sites as well as the initiation and maintenance of an SA-accumulating defense loop that  
411 manifests a 'being prepared when it happens again' information (Hake & Romeis, 2018).

412

## 413 **CPK5 signaling triggers *SARD1*-dependent SAR and mediates 'super-priming'**

414 Plants overexpressing CPK5-YFP show increased basal resistance to the virulent bacterial  
415 pathogen *Pst*. CPK5 signaling-mediated immunity is thereby dependent on SA. In crosses of  
416 the *CPK5-YFP#7* line to mutants *ics1*, *eds5*, *pad4*, and *npr1-1* implicated in SA biosynthesis  
417 and signaling in PTI and ETI, CPK5-dependent defense marker gene expression and  
418 resistance to virulent *Pst* is compromised and plant growth is reverted to wild type (Fig. **1**).  
419 CPK5 can, therefore, be placed upstream of PAD4 and the cascade of SA-dependent  
420 defense reactions.

421 Here we show that CPK5-YFP overexpressing plants constitutively express SAR marker  
422 genes *ALD1* and *FMO1* at late time points in distal leaves, and these plants also accumulate  
423 Pip (Fig. 2, Fig. S2). Plants of enhanced CPK5-signaling contain therefore all essential  
424 components for a Pip- and SA-dependent signaling amplification loop via *ALD1/FMO1/ICS1*.  
425 Consistently, CPK5-YFP overexpressing lines show a 'super-priming' phenotype of  
426 enhanced bacterial resistance in the context of SAR (Fig. 3, 4, 5). Priming and 'super-  
427 priming' is entirely lost in crosses *ald1* x *CPK5-YFP#7* and *fmo1* x *CPK5-YFP#7* (Fig. 4d),  
428 and the benefit of enhanced CPK5-signaling is lost in both, basal and systemic resistance  
429 (Fig. 4c,d).

430 Additionally, enhanced CPK5-signaling results in a constitutive accumulation of *SARD1*  
431 transcript, validating the constitutive high *ALD1* and *FMO1* expression levels in these lines  
432 even in absence of any pathogen-related stimulation. Comparably low systemic *SARD1*  
433 expression and low *ALD1* and *FMO1* transcript levels are detected in *cpk5* (Fig. 2b). Plants  
434 that overexpress *SARD1* are reported to be more resistant to bacterial infection in basal  
435 immunity and to accumulate SA (Zhang *et al.*, 2010), similar to what is observed for CPK5-  
436 overexpressing lines. Interestingly, high constitutive transcript levels of *ALD1* and *FMO1* in  
437 *CPK5-YFP#7* are reverted in a *sard1* background (Fig. 5c), mimicking the *sard1* single  
438 mutant (Sun *et al.*, 2015). Remarkably, upon an flg22 immune stimulus, systemic *ALD1* and  
439 *FMO1* expression at 2 dpi is induced to a comparably high level as seen for enhanced  
440 CPK5-signaling in *CPK5-YFP#7* (Fig. 5c). These data suggest that a local pathogen attack  
441 induces basal resistance which includes CPK5, CPK6, and in case other CPKs. In addition,  
442 CPK5 participates in signal propagation and in the control of a distal switch into SAR. Yet, in  
443 the absence of *SARD1*, SAR cannot be maintained.

444 This interpretation is mirrored by SAR bacterial growth phenotypes of the respective crossing  
445 lines. Plants of *ald1* x *CPK5-YFP#7* and *fmo1* x *CPK5-YFP#7* lost both, the CPK5-mediated  
446 enhanced basal resistance and systemic priming (Fig. 4c,d). In *sard1* x *CPK5-YFP#7* the  
447 enhanced CPK5-dependent basal resistance from *CPK5-YFP#7* is retained, but a memory of  
448 'having been attacked', the *SARD1*-dependent additional (super-) priming which is  
449 corroborated by a constitutive *ALD1* and *FMO1* expression, is lost (Fig. 5b). These data link  
450 CPK5-signaling with *SARD1* function, and both are required to mount and maintain the  
451 primed plant state manifesting the immune memory. *sard1* plants still respond to flg22 with  
452 local and systemic immune reactions and thus are able to synthesize and propagate an  
453 immune signal. However, the ultimate switch into SAR through a SA- and Pip-dependent  
454 self-containing amplification loop of *ALD1/FMO1/ICS1* cannot be accomplished in the  
455 absence of *SARD1*.

456 *SARD1* is a key regulatory transcription factor that binds to the promoters of a large number  
457 of genes, for which a positive or negative role in systemic plant resistance can be attributed,

458 including *ICS1*. Its expression is tightly controlled by positive and negative regulation in a  
459 temporally and spatially manner and occurs late in systemic tissue (Wang *et al.*, 2011; Zheng  
460 *et al.*, 2015; Sun *et al.*, 2018; Zhou *et al.*, 2018). It is unclear yet, whether *SARD1* expression  
461 is also controlled by post-transcriptional mechanisms that may directly impact *SARD1*-  
462 dependent SAR, for example by phosphorylation through CPK5.

463

#### 464 **CPK5 links the calcium-regulatory network with immune signaling**

465 The role of calcium-signaling, well characterized during local PAMP-induced immune  
466 reactions, is less clear in late systemic signaling and the switch to SAR. Regulatory calcium-  
467 binding proteins such as CMLs and AGP5, in particular, those that are under transcriptional  
468 control of *SARD1/CBP60g* (Truman & Glazebrook, 2012; Aldon *et al.*, 2018), may depend on  
469 temporal and spatial distinct intracellular calcium conditions from those of initiating local  
470 calcium burst. Interestingly, calmodulin-dependent transcriptional regulators CAMTA3 and  
471 CBP60a have been described as negative regulators in the control of long-term  
472 transcriptional reprogramming of defense genes (Galon *et al.*, 2008; Truman & Glazebrook,  
473 2012; Sun *et al.*, 2015). These data implicate that the intracellular calcium status is essential  
474 also in the control of SAR.

475 CPK5 and CPK6 classify to the CPDK subfamily I and comply with a consensus CDPK  
476 enzyme with 4 canonical EF-hand motifs (Cheng *et al.*, 2002). In biochemical assays the  
477 catalytic activities of CPK5 and CPK6 are calcium-dependent. A remarkably low K50 [ $\text{Ca}^{2+}$ ]  
478 of 93 nM was determined for CPK5 and of 186 nM for CPK6 (Fig. **6a,c**). These data indicate  
479 that in particular CPK5 is most sensitive to subtle [ $\text{Ca}^{2+}$ ] changes around the intracellular  
480 resting calcium concentration. Thus, this low K50 [ $\text{Ca}^{2+}$ ] may explain why CPK5 (but not  
481 CPK6) is part of a signal propagation mechanism from local to distal sites via a  
482 CPK5/RBOHD-driven auto-activation circuit (Dubiella *et al.*, 2013), why overexpression of  
483 CPK5 (but not of CPK6) induces SAR, and why CPK5 (but not CPK4, CPK6, and CPK11) is  
484 required for defense responses in autoimmune mutants such as in *exo70B1* (Liu *et al.*,  
485 2017). Thus, CPK6 (here: K50 [ $\text{Ca}^{2+}$ ] of 186 nM) and other CPKs such as CPK4 and CPK11  
486 (reported K50 [ $\text{Ca}^{2+}$ ] of ~ 3  $\mu\text{M}$  and ~ 4  $\mu\text{M}$ , respectively (Boudsocq *et al.*, 2012)) may  
487 become fully activated and contribute to defense activation upon an intracellular calcium  
488 burst for example as consequence of a direct local pathogen attack or exposure to PAMP  
489 flg22. But these enzymes may not be suited to decode subtle calcium changes when  
490 propagating a signal or activating SAR in distal tissue. CPK6, the phylogenetically closest  
491 homolog to CPK5, has predominantly been implicated in guard cell function during the  
492 control of the stomatal aperture (Mori *et al.*, 2006; Brandt *et al.*, 2012; Ye *et al.*, 2013). The  
493 CPK6 overexpressing line *CPK6-YFP#23* does neither show constitutive SAR marker gene  
494 expression nor enhanced SAR towards bacterial pathogens (Fig. **2a, 3d**). Consistently, ROS-

495 generation driving immune signal propagation has been shown to be compromised in *cpk5*  
496 but not in *cpk6* (Dubiella *et al.*, 2013).

497

#### 498 **CPK5 protein amount and catalytic activity contribute to the manifestation of priming**

499 The underlying mechanism that manifests SAR is a matter of ongoing research and the  
500 accumulation and activation of signaling molecules, the modifications at the chromatin level  
501 and at the transcriptome may all contribute to immune memory (Conrath *et al.*, 2015; Hilker  
502 *et al.*, 2015; Martinez-Medina *et al.*, 2016; Reimer-Michalski & Conrath, 2016; Hake &  
503 Romeis, 2018).

504 A role of mitogen-activated protein (MAP) kinases MPK3 and MPK6 has been demonstrated  
505 in chemically-induced resistance. Priming correlated with enhanced *MPK* transcript levels  
506 and the accumulation of (yet inactive) MPK3 and MPK6 proteins. Exposure to a triggering  
507 stimulus not only led to enhanced MPK biochemical activation but also to increased MPK-  
508 dependent downstream signaling, resulting in more prominent defense reactions.  
509 Consistently, priming responses were compromised or lost in mutant lines of *mpk3* and *mpk6*  
510 (Beckers *et al.*, 2009). MPK3 and MPK6 were shown to contribute to SAR via an *ALD1*-  
511 pipecolic acid regulatory loop (Y. Wang *et al.*, 2018). Furthermore, an interplay between MPK  
512 and CPK signaling has been demonstrated for innate immune signaling in PTI (Boudsocq *et al.*,  
513 2010), where exemplary defense gene activation was shown to be either MPK-specific,  
514 or CPK-specific, or to be controlled through joint MPK- and CPK-signaling. CPK5 signaling  
515 contributed to the activation of transcriptional regulators WRKY8, 28, and 48 upstream of  
516 WRKY46 and CPK5 phosphorylates recombinant WRKY28 and WRKY48 proteins (Gao *et al.*,  
517 2013). Thus, it is conceivable that transcriptional regulators downstream of protein kinase  
518 signaling become increasingly essential in the transition from ETI to SAR. Interestingly, Chip-  
519 Seq analysis revealed promoter sequences recognized by SARD1 in primed plants. Among  
520 SARD1-binding sequences have been identified promoters of signaling genes *MPK3* and  
521 *CPK4*, in addition to promoters of genes of the SA/Pip amplification loop (*ALD1/FMO1/ICS1*),  
522 and of promoters of genes mediating general SA-dependent PTI and ETI defense signaling  
523 (*EDS1*, *PAD4*, *NPR1*) (Sun *et al.*, 2015). These data corroborate that the accumulation of  
524 (potentially not yet fully active) signaling proteins such as MPKs and CPKs are part of the  
525 repertoire to manifest a primed plant status.

526 In the CPK5-overexpressing line *CPK5-YFP#7* the enzyme accumulates to a high protein  
527 amount that is even stronger in line CPK5-YFP # 2 (Dubiella *et al.*, 2013). Additionally, the  
528 CPK5-YFP fusion protein is biochemically more active at a given low cytoplasmic [Ca<sup>2+</sup>] level  
529 than native CPK5, which correlates with an observed constitutive biochemical  
530 phosphorylation activity of CPK5-YFP in these lines (Dubiella *et al.*, 2013). Taken together,  
531 our data are consistent with the interpretation that CPK5-YFP mimics a pre-formed

532 ('primed'), phosphorylation competent state (synonymous to a so-called 'protein mark'),  
533 which in dependency of *SARD1* is responsible for 'super-priming'.

534 Our data are in accordance with a model where CPK5 guards the cytoplasmic calcium status  
535 in resting cells facilitated by its low K50 [ $\text{Ca}^{2+}$ ] (Fig. 7). Following a primary pathogen attack  
536 and subsequent rise in cytoplasmic [ $\text{Ca}^{2+}$ ], CPK5 predominantly acquires its open  
537 conformation, and local defenses and basal immunity are established, in case in joint  
538 function with other locally activated CPKs. In ETI, the information of 'having been attacked' is  
539 spread via a CPK5-mediated calcium/ROS propagation mechanism and meets the command  
540 of 'having to defend' mediated through the synthesis and accumulation of SA and Pip / NHP  
541 defense metabolites, which in the presence of *SARD1* lead to a switch into and maintenance  
542 of SAR in systemic plant tissue. It is conceivable that during the immune memory CPK5  
543 adopts a primed enzyme state, likely manifested through a distinct intramolecular pattern of  
544 protein phosphorylation combined with a change in protein conformation that allows a more  
545 rapid enzyme transition to the fully active state upon a triggering stimulus, for example during  
546 a secondary pathogen attack (Fig. 7).

547 Thus, CPK5-signaling, already required for the spatial defense signal spread into the entire  
548 foliage of a plant, may also contribute to the temporal switch - via the linkage of calcium  
549 signaling to the activation of *SARD1* – to induce (reversible) SAR. Whether *SARD1* is solely  
550 activated on the transcriptional level or also on the post-translational level, e.g. upon direct  
551 interaction and phosphorylation of *SARD1* protein through CPK5, remains to be shown.

552

### 553 **Acknowledgments**

554 This research was funded by Deutsche Forschungsgemeinschaft (DFG) within Collaborative  
555 Research Centre SFB973 to T.R. We thank Jennifer Bortlik for the transformation of  
556 *Arabidopsis* with the CPK6-YFP construct and Katharina Hake for critical reading and  
557 discussion of the manuscript. *Psm* and *Psm avrRpm1* strains were kindly provided by Jürgen  
558 Zeier (University Düsseldorf), the *cpk5 cpk6* double mutant line was kindly provided by Marie  
559 Boudsocq (Institute of Plant Sciences Paris Saclay).

560

### 561 **Author contributions**

562 T.G., T.R. conceived and designed the research. T.G., S.S., F-P.S., B.C. performed  
563 experiments. T.G., B.C., F-P.S., T.R. analyzed data. T.G. and T.R. wrote the manuscript.

564



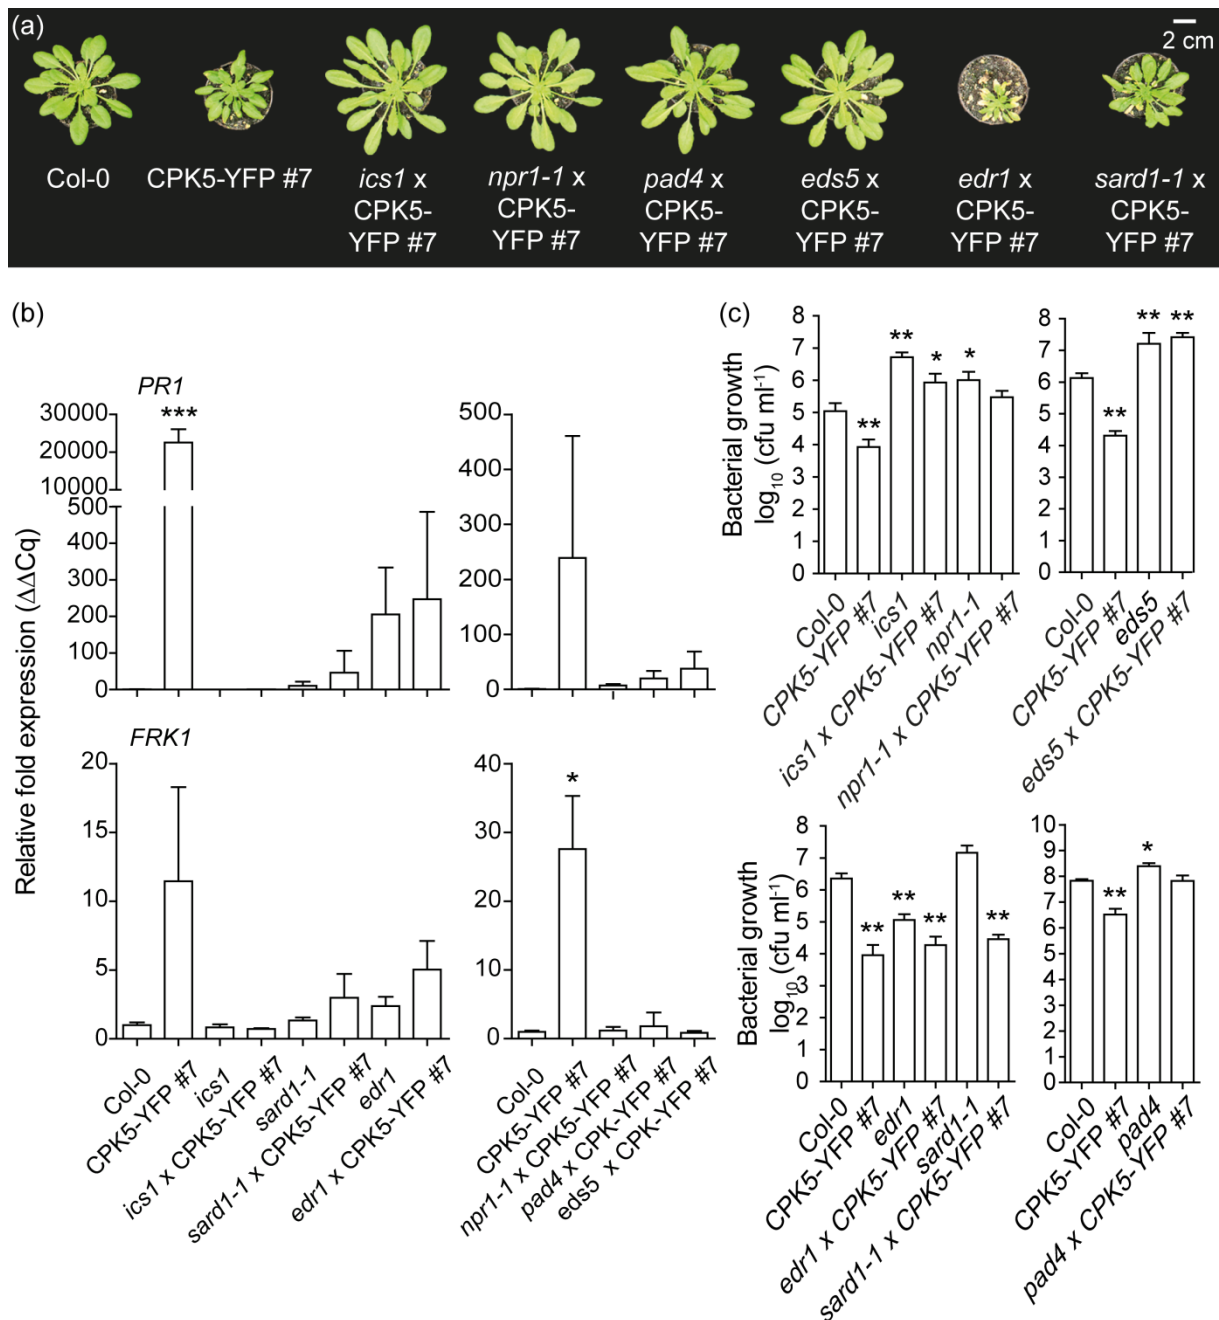

565

566 **Fig. 1** CPK5 signaling-dependent basal pathogen resistance requires SA-biosynthesis and  
 567 signaling but is independent on *SARD1*.

568 (a) Six-week-old plants of Col-0, CPK5-YFP#7, and of derived crosses with *ics1*, *npr1*, *pad4*,  
 569 *eds5*, *edr1*, and *sard1*. Scale = 2 cm. (b) Basal *PR1* and *FRK1* gene expression of plants as  
 570 shown in (a) was analyzed by RT-qPCR. Bars represent mean value  $\pm$  SEM of three  
 571 biological replicates. The asterisks indicate statistically significant differences in comparison  
 572 to Col-0 (one-way ANOVA; Dunnett posttest; \*\*\*,  $P < 0.001$ ; \*,  $P < 0.05$ ). (c) Six-week-old  
 573 plants as shown in (a) were inoculated with *Pseudomonas syringae* pv. *tomato* (*Pst*)  
 574 DC3000. Bacterial numbers were monitored 0 dpi (data not shown) and 3 dpi. Bars represent  
 575 mean value  $\pm$  SEM of 12 biological replicates. The asterisks indicate statistically significant

576 differences in comparison to Col-0 (one-way ANOVA; Dunnett posttest; \*\*,  $P < 0.01$ ; \*,  
 577  $P < 0.05$ ). The experiment was repeated three times with similar results.  
 578

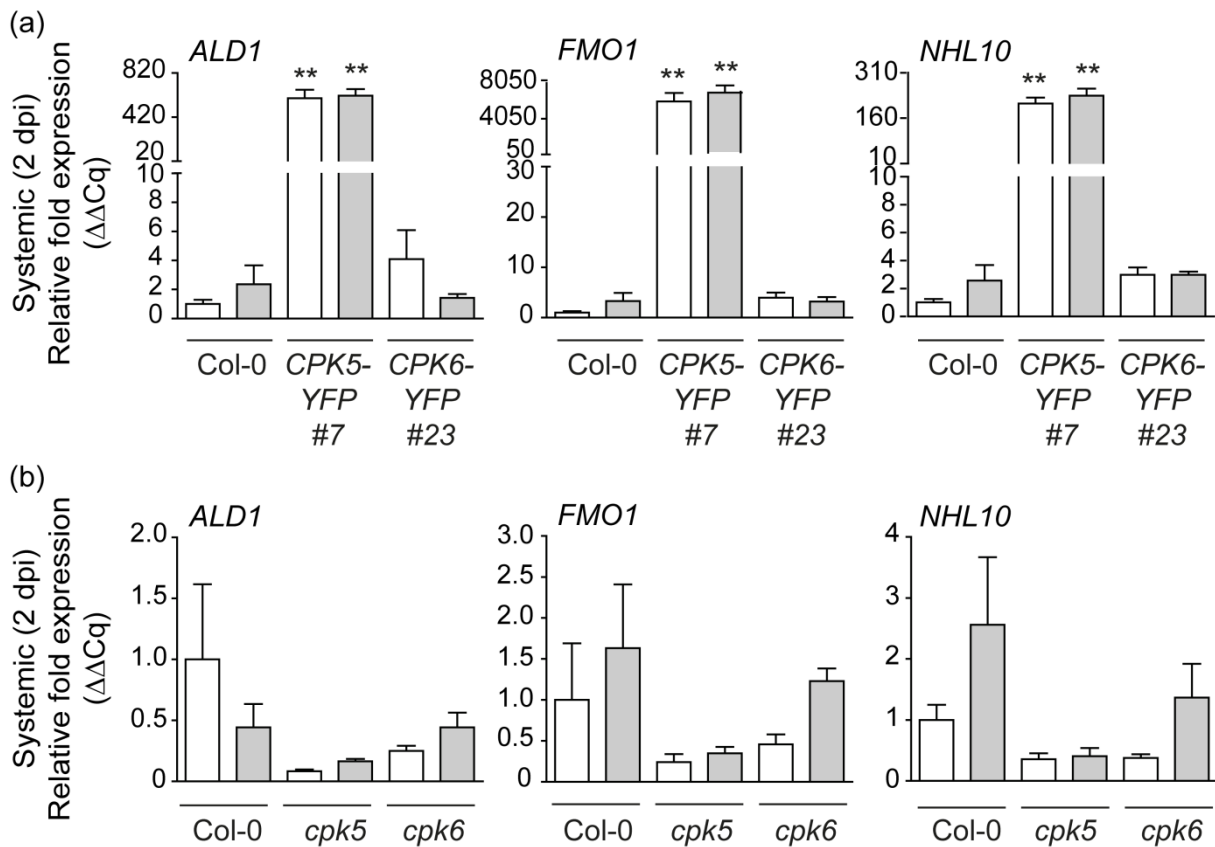

579

580 **Fig. 2** CPK5 but not CPK6 is involved in late systemic defense signaling.

581 (a) Enhanced CPK5-signaling results in constitutive systemic expression of *ALD1*, *FMO1*,  
 582 and *NHL10* at 2 dpi. Three local leaves of six-week-old plants of Col-0, *CPK5-YFP#7*, and  
 583 *CPK6-YFP#23* were infiltrated with 10 mM  $MgCl_2$  (mock/white bars) or 200 nM flg22 (grey  
 584 bars). After two days, three systemic leaves were harvested and gene expression was  
 585 analyzed by qRT-PCR. Bars represent mean value  $\pm$  SEM of three biological replicates. The  
 586 asterisks indicate statistically significant differences in comparison to Col-0 mock (one-way  
 587 ANOVA; Dunnett posttest; \*\*,  $P < 0.01$ ). The experiment was repeated with similar results. (b)  
 588 Systemic defense gene expression at 2 dpi is reduced in *cpk5*. Col-0, *cpk5*, and *cpk6* leaves  
 589 were analyzed as described in (a). Bars represent mean value  $\pm$  SEM of three biological  
 590 replicates. The experiment was repeated with similar results.

591

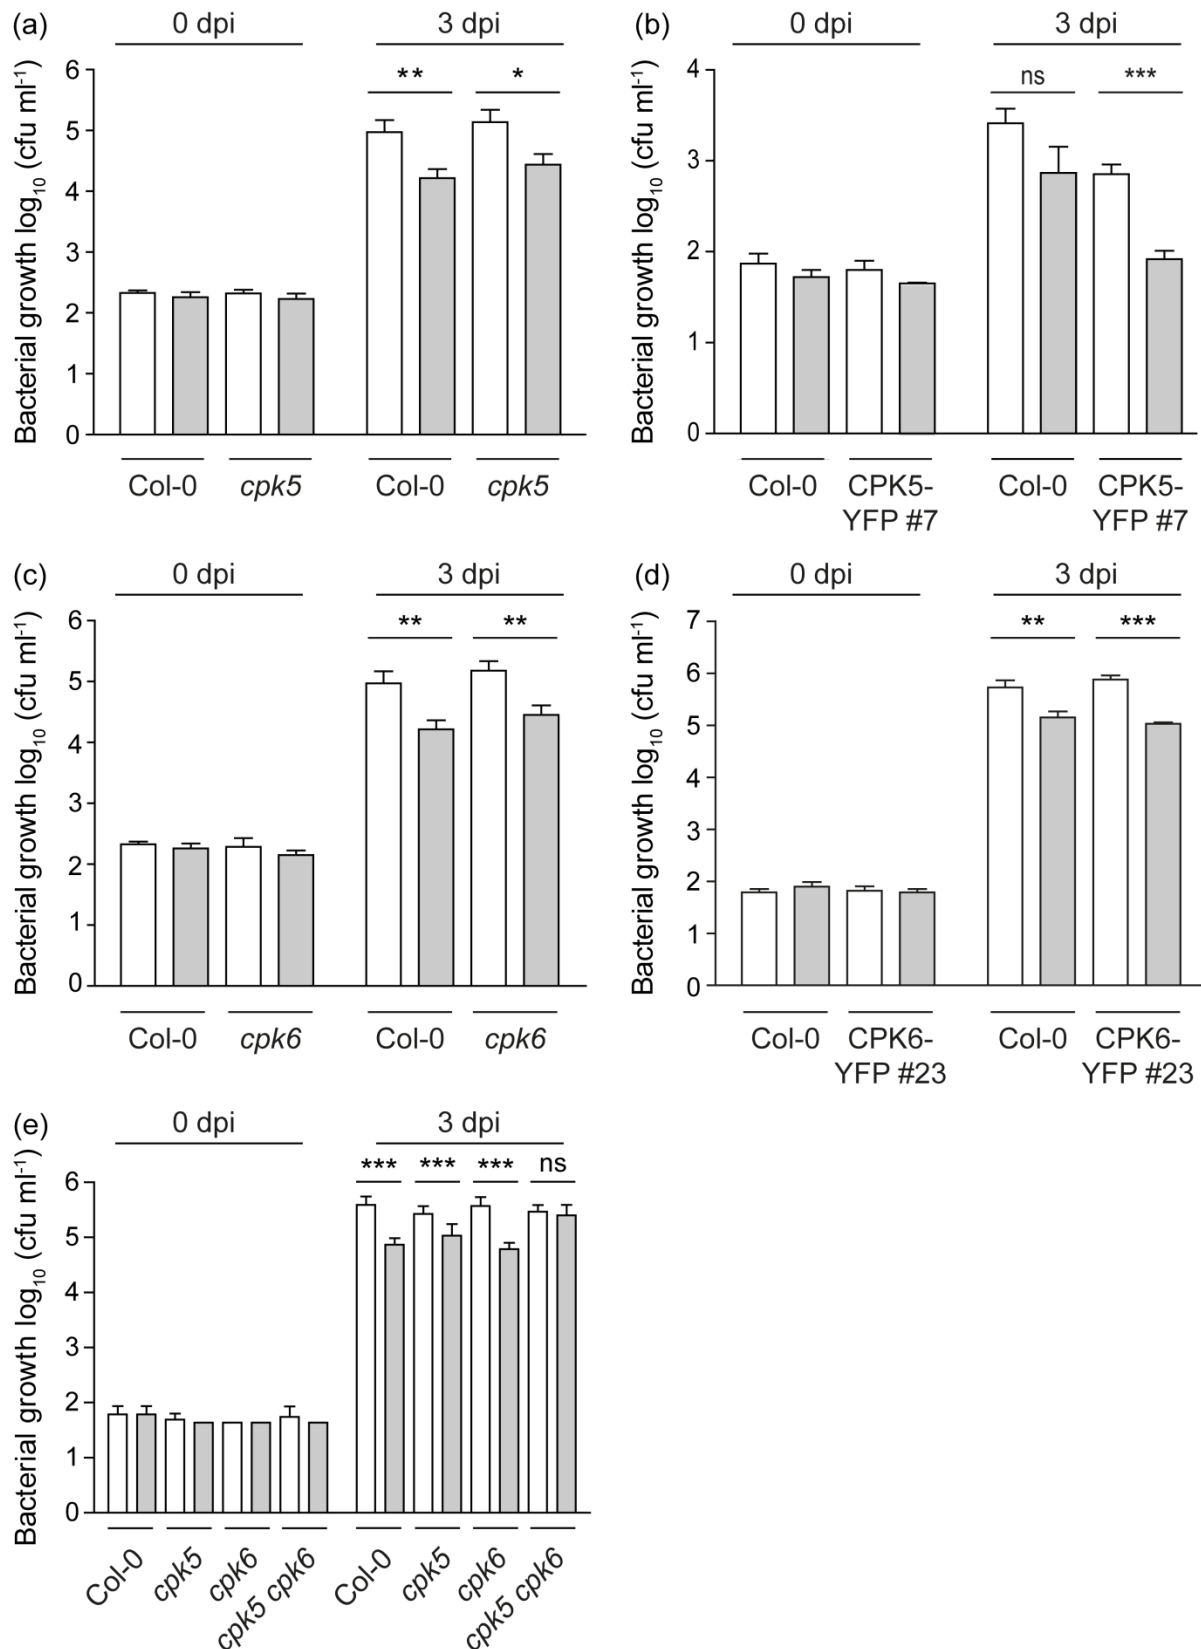

592

593 **Fig. 3** Enhanced CPK5-signaling triggers immune priming.

594 (a-e) Six-week-old plants of *Col-0*, *cpk5* (a), *CPK5-YFP#7* (b), *cpk6* (c), *CPK6-YFP#23* (d),

595 and *cpk5 cpk6* (e) were subjected to a priming infection by avirulent bacterial strain

596 *Pseudomonas syringae* pv. *maculicola* ES 4326 *avrRpm1* (*Psm avrRpm1*) (grey bars) or a

597 mock control (10 mM MgCl<sub>2</sub>) (white bars) in local leaves. After two days, distal leaves were  
 598 subjected to triggering infection with virulent strain *Psm* ES 4326. Bacterial numbers of the  
 599 triggering strain were monitored 0 dpi and 3 dpi. Bars represent mean value ± SEM of 12  
 600 biological replicates. The asterisks indicate statistically significant differences in comparison  
 601 to mock at 3 dpi (student's t-test; \*\*\*,  $P < 0.001$ ; \*\*,  $P < 0.01$ ; \*,  $P < 0.05$ ; ns, not significant). The  
 602 experiments were repeated three times with similar results.  
 603

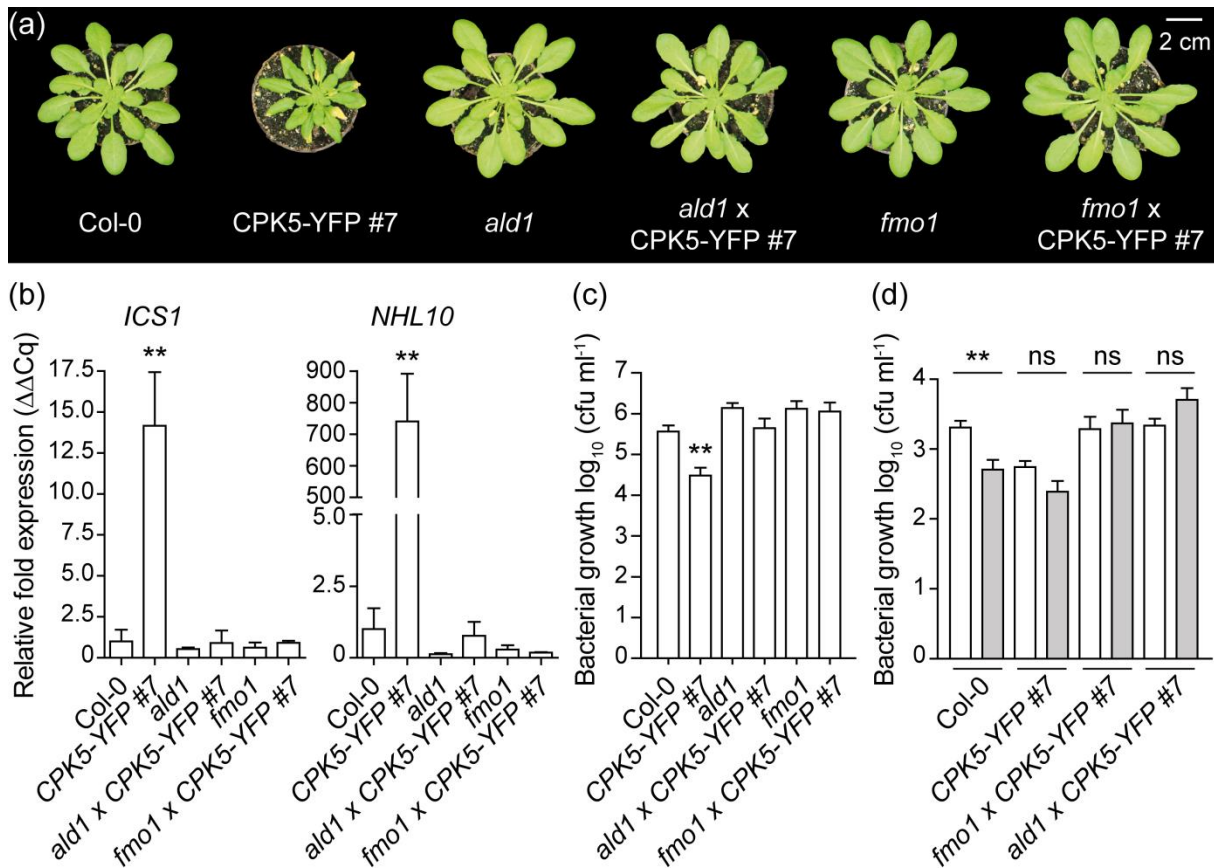

604  
 605 **Fig. 4** CPK5-mediated resistance is dependent on *ALD1* and *FMO1*.  
 606 (a) Six-week-old plants of Col-0, *CPK5-YFP#7*, and derived crosses with *ald1* and *fmo1*.  
 607 Scale = 2 cm. (b) Basal *ICS1* and *NHL10* gene expression of plants as shown in (a) was  
 608 analyzed by RT-qPCR. Bars represent mean value ± SEM of three biological replicates. The  
 609 asterisks indicate statistically significant differences in comparison to Col-0 (one-way  
 610 ANOVA; Dunnett posttest; \*\*,  $P < 0.01$ ). (c) Six-week-old plants as shown in (a) were  
 611 inoculated with *Pseudomonas syringae* pv. *tomato* (*Pst*) DC3000. Bacterial numbers were  
 612 monitored 0 dpi (data not shown) and 3 dpi. Bars represent mean value ± SEM of 12  
 613 biological replicates. The asterisks indicate statistically significant differences in comparison  
 614 to Col-0 (one-way ANOVA; Dunnett posttest; \*\*,  $P < 0.01$ ). The experiment was repeated  
 615 three times with similar results. (d) Six-week-old plants as shown in (a) were subjected to  
 616 priming infection with avirulent bacterial strain *Psm avrRpm1* (*Pseudomonas syringae* pv.  
 617 *maculicola* (*Psm*) ES 4326 *avrRpm1*) or mock control (10 mM MgCl<sub>2</sub>) in local leaves. After

618 two days, distal leaves were subjected to triggering infection with virulent strain *Psm* ES  
619 4326. Bacterial numbers of the triggering strain were monitored 0 dpi (data not shown) and 3  
620 dpi. Bars represent mean value  $\pm$  SEM of 12 biological replicates. The asterisks indicate  
621 statistically significant differences in comparison to mock at 3 dpi (student's t-test; \*\*,  $P < 0.01$ ;  
622 ns, not significant). The experiment was repeated with similar results.  
623

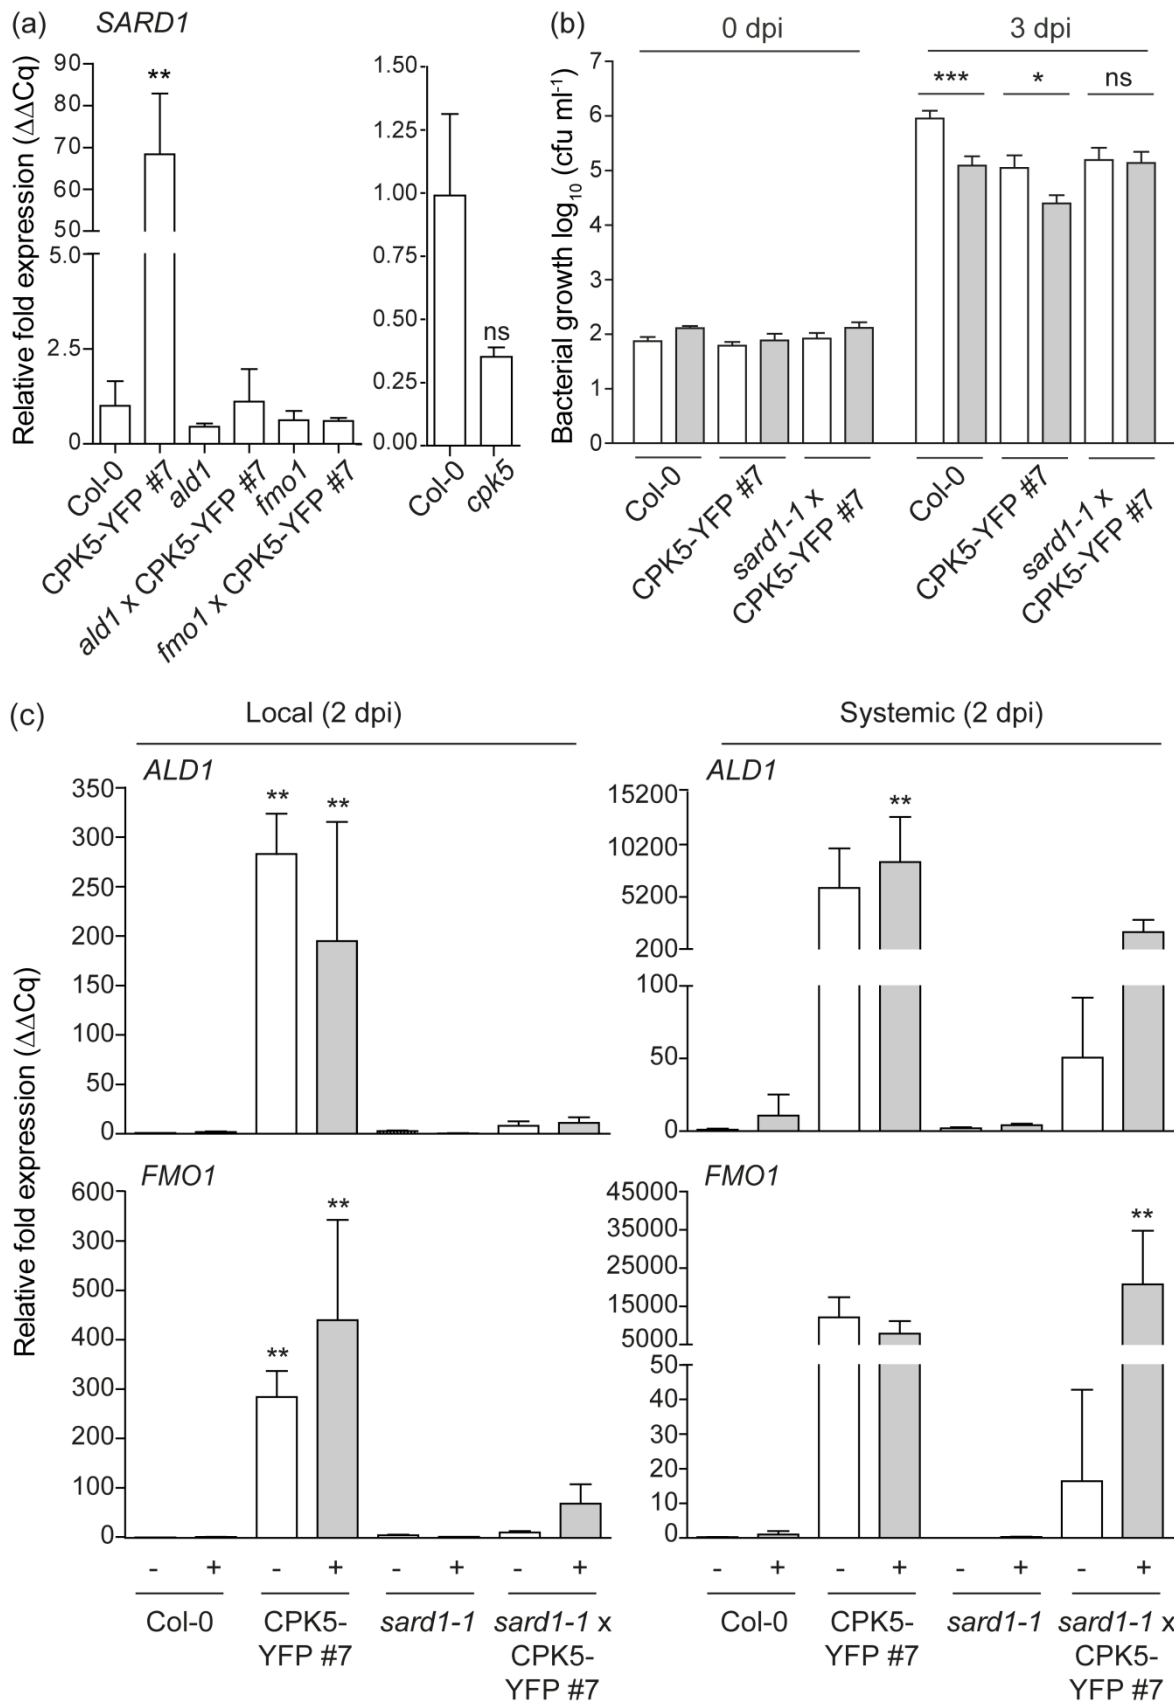

624

625

**Fig. 5** CPK5-dependent 'super-priming' requires *SARD1*.

626

(a) Basal *SARD1* gene expression in six-week-old plants of Col-0, *CPK5-YFP#7*, and derived

627

crosses with *ald1* and *fmo1* (left panel) and *cpk5* (right panel), respectively, were analyzed

628 by RT-qPCR. Bars represent mean value  $\pm$  SEM of three biological replicates. The asterisks  
629 indicate statistically significant differences in comparison to Col-0 (one-way ANOVA; Dunnett  
630 posttest; \*\*,  $P < 0.01$ ; ns, not significant). **(b)** Six-week-old plants of Col-0, *CPK5-YFP#7*, and  
631 *sard1-1* x *CPK5-YFP#7* were subjected to priming and triggering infection as described in  
632 (Fig. 3 (b)). Bacterial numbers were monitored 0 dpi (data not shown) and 3 dpi of the  
633 triggering strain. Bars represent mean value  $\pm$  SEM of 12 biological replicates. The asterisks  
634 indicate statistically significant differences in comparison to mock at 3 dpi (student's t-test; \*\*,  $P < 0.01$ ;  
635 \*,  $P < 0.05$ ; ns, not significant). The experiment was repeated with similar results. **(c)**  
636 Local and systemic *ALD1* and *FMO1* expression of Col-0, *CPK5-YFP#7*, *sard1-1* and *sard1-*  
637 *1* x *CPK5-YFP#7* was analyzed by qRT-PCR 2 dpi after mock (white bars) or flg22 (grey  
638 bars) stimulus as described in Fig. 2 (a). Bars represent mean value  $\pm$  SEM of three  
639 biological replicates. The asterisks indicate statistically significant differences in comparison  
640 to Col-0 mock (one-way ANOVA; Dunnett posttest; \*\*,  $P < 0.01$ ). The experiment was  
641 repeated with similar results.  
642

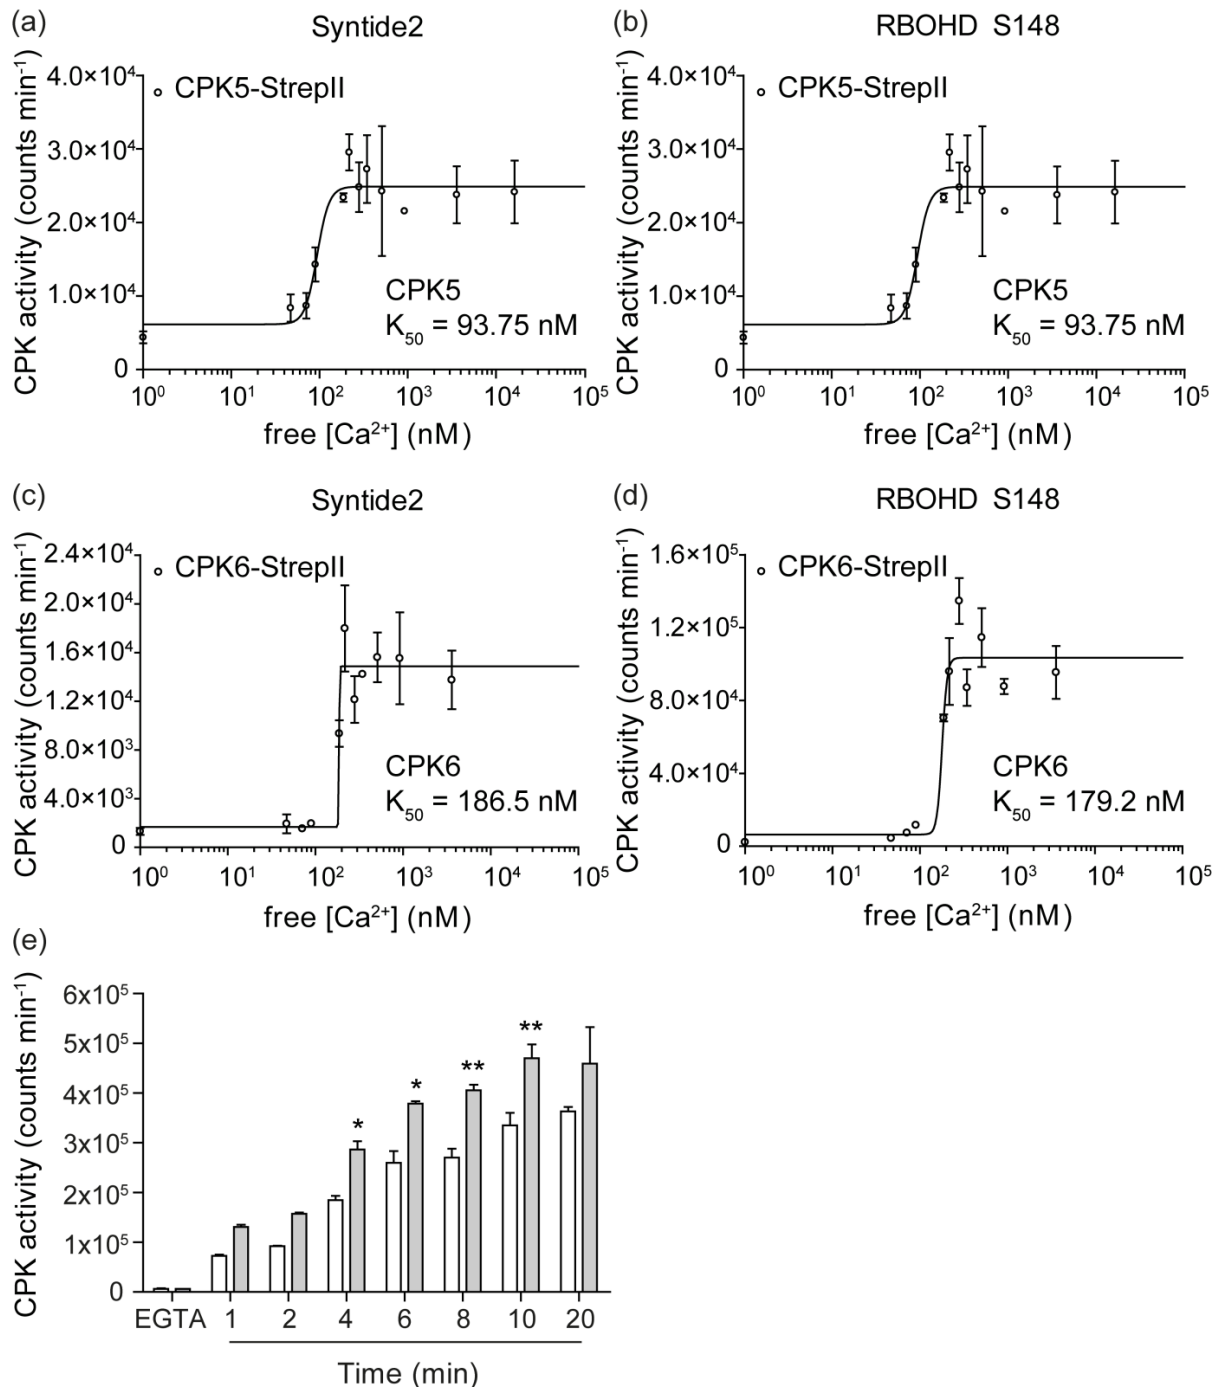

643

644 **Fig. 6** CPK5 displays high kinase activity at low Ca<sup>2+</sup>-concentrations.

645 (a), (b) Ca<sup>2+</sup>-dependent protein kinase activity of CPK5-StrepII. Kinase activity of affinity-  
 646 purified recombinant protein CPK5-StrepII (25 nM) was analyzed in an *in vitro* kinase assay  
 647 toward 10 μM substrate peptide Syntide 2 (a) and RBOHD S148 (10 aa peptide  
 648 encompassing S148) (b), respectively, for 20 min in a series of increasing Ca<sup>2+</sup>  
 649 concentrations as indicated and K50 was determined. Data represent mean value ± SEM of  
 650 two technical replicates. The experiment was repeated with similar results. (c), (d) Ca<sup>2+</sup>-  
 651 dependent protein kinase activity of CPK6-StrepII. Kinase activity of affinity-purified  
 652 recombinant protein CPK6-StrepII (25 nM) was analyzed in an *in vitro* kinase assay toward



653 Syntide 2 (c) and RBOHD S148 (d), respectively, as described for (a), (b). (e)  $\text{Ca}^{2+}$ -  
 654 dependent protein kinase activity of affinity-purified recombinant CPK5-StrepII or CPK5-YFP-  
 655 StrepII (25 nM protein) was assessed over a fast time kinetic from 0 to 20 min in an *in vitro*  
 656 kinase assay with 10  $\mu\text{M}$  substrate peptide RBOHD S148 without calcium or at a fixed  
 657 saturating  $\text{Ca}^{2+}$  concentration of 0.5  $\mu\text{M}$ . Bars represent mean value  $\pm$  SEM of two technical  
 658 replicates. The asterisks indicate statistically significant differences of CPK5-YFP-StrepII in  
 659 comparison to CPK5-StrepII (two-way ANOVA; Bonferroni posttest; \*,  $P < 0.05$ ; \*\*,  $P < 0.01$ ).  
 660 The experiment was repeated with similar results.  
 661

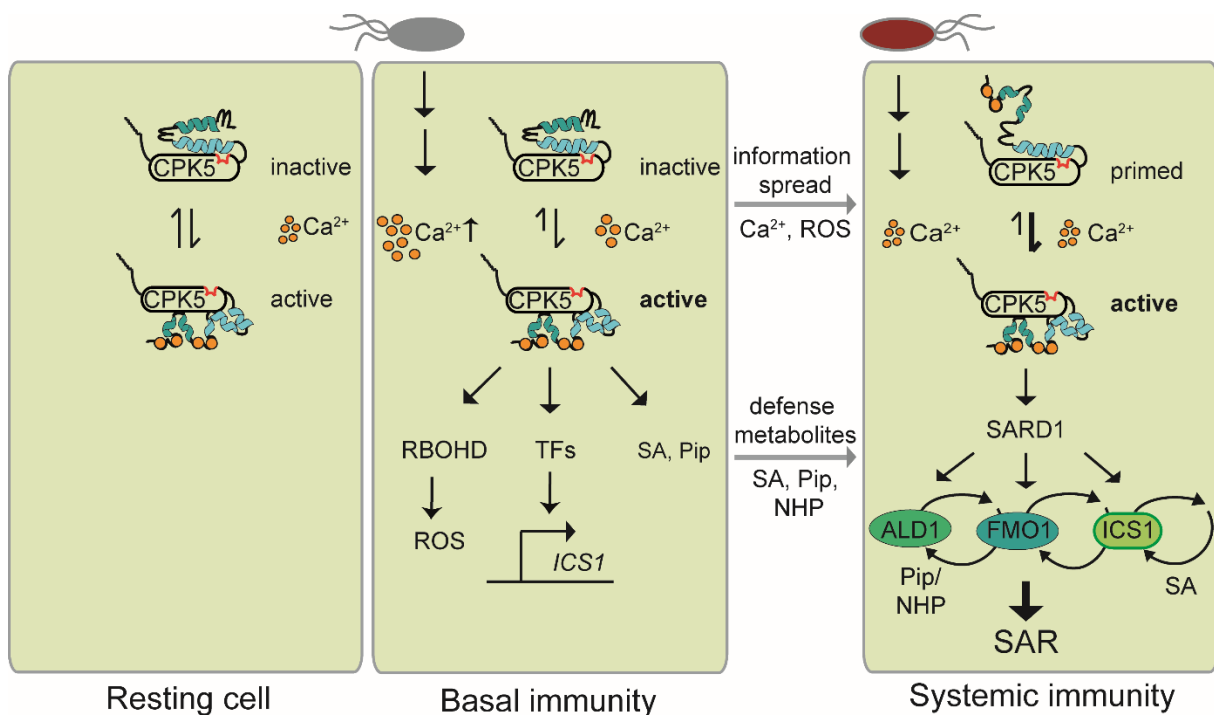

662 **Fig. 7** Scheme of  $\text{Ca}^{2+}$ -dependent CPK5 activation and function in immune responses,  
 663 priming, and SAR.  
 664

665 **References**

666 **Aldon D, Mbengue M, Mazars C, Galaud JP. 2018.** Calcium signalling in plant biotic  
 667 interactions. *Int J Mol Sci* **19**(3).  
 668 **Beckers GJ, Jaskiewicz M, Liu Y, Underwood WR, He SY, Zhang S, Conrath U. 2009.**  
 669 Mitogen-activated protein kinases 3 and 6 are required for full priming of stress  
 670 responses in *arabidopsis thaliana*. *Plant Cell* **21**(3): 944-953.  
 671 **Bernsdorff F, Doring AC, Gruner K, Schuck S, Brautigam A, Zeier J. 2016.** Pipecolic acid  
 672 orchestrates plant systemic acquired resistance and defense priming via salicylic  
 673 acid-dependent and -independent pathways. *Plant Cell* **28**(1): 102-129.  
 674  
 675

- 676 **Boudsocq M, Droillard MJ, Regad L, Lauriere C. 2012.** Characterization of *arabidopsis*  
677 calcium-dependent protein kinases: Activated or not by calcium? *Biochem J* **447**(2):  
678 291-299.
- 679 **Boudsocq M, Willmann MR, McCormack M, Lee H, Shan L, He P, Bush J, Cheng SH,**  
680 **Sheen J. 2010.** Differential innate immune signalling via  $ca^{2+}$  sensor protein kinases.  
681 *Nature* **464**(7287): 418-422.
- 682 **Brandt B, Brodsky DE, Xue S, Negi J, Iba K, Kangasjarvi J, Ghassemian M, Stephan**  
683 **AB, Hu H, Schroeder JI. 2012.** Reconstitution of abscisic acid activation of slac1  
684 anion channel by cpk6 and ost1 kinases and branched abi1 pp2c phosphatase  
685 action. *Proc Natl Acad Sci U S A* **109**(26): 10593-10598.
- 686 **Cheng SH, Willmann MR, Chen HC, Sheen J. 2002.** Calcium signaling through protein  
687 kinases. The *arabidopsis* calcium-dependent protein kinase gene family. *Plant*  
688 *Physiol* **129**(2): 469-485.
- 689 **Conrath U. 2006.** Systemic acquired resistance. *Plant Signal Behav* **1**(4): 179-184.
- 690 **Conrath U, Beckers GJ, Langenbach CJ, Jaskiewicz MR. 2015.** Priming for enhanced  
691 defense. *Annu Rev Phytopathol* **53**: 97-119.
- 692 **Costa A, Navazio L, Szabo I. 2018.** The contribution of organelles to plant intracellular  
693 calcium signalling. *J Exp Bot* 10.1093/jxb/ery185.
- 694 **Ding P, Rekhter D, Ding Y, Feussner K, Busta L, Haroth S, Xu S, Li X, Jetter R,**  
695 **Feussner I, et al. 2016.** Characterization of a pipecolic acid biosynthesis pathway  
696 required for systemic acquired resistance. *Plant Cell* **28**(10): 2603-2615.
- 697 **Ding Y, Sun T, Ao K, Peng Y, Zhang Y, Li X, Zhang Y. 2018.** Opposite roles of salicylic  
698 acid receptors npr1 and npr3/npr4 in transcriptional regulation of plant immunity. *Cell*  
699 **173**(6): 1454-1467 e1415.
- 700 **Dubiella U, Seybold H, Durian G, Komander E, Lassig R, Witte CP, Schulze WX,**  
701 **Romeis T. 2013.** Calcium-dependent protein kinase/nadph oxidase activation circuit  
702 is required for rapid defense signal propagation. *Proc Natl Acad Sci U S A* **110**(21):  
703 8744-8749.
- 704 **Durrant WE, Dong X. 2004.** Systemic acquired resistance. *Annu Rev Phytopathol* **42**: 185-  
705 209.
- 706 **Fu ZQ, Dong X. 2013.** Systemic acquired resistance: Turning local infection into global  
707 defense. *Annu Rev Plant Biol* **64**: 839-863.
- 708 **Fu ZQ, Yan S, Saleh A, Wang W, Ruble J, Oka N, Mohan R, Spoel SH, Tada Y, Zheng N,**  
709 **et al. 2012.** Npr3 and npr4 are receptors for the immune signal salicylic acid in plants.  
710 *Nature* **486**(7402): 228-232.

- 711 **Galon Y, Nave R, Boyce JM, Nachmias D, Knight MR, Fromm H. 2008.** Calmodulin-  
712 binding transcription activator (camta) 3 mediates biotic defense responses in  
713 arabidopsis. *FEBS Lett* **582**(6): 943-948.
- 714 **Gao X, Chen X, Lin W, Chen S, Lu D, Niu Y, Li L, Cheng C, McCormack M, Sheen J, et**  
715 **al. 2013.** Bifurcation of arabidopsis nlr immune signaling via  $ca^{2+}$ -dependent protein  
716 kinases. *PLoS Pathog* **9**(1): e1003127.
- 717 **Gao X, He P. 2013.** Nuclear dynamics of *arabidopsis* calcium-dependent protein kinases in  
718 effector-triggered immunity. *Plant Signal Behav* **8**(4): e23868.
- 719 **Glazebrook J, Zook M, Mert F, Kagan I, Rogers EE, Crute IR, Holub EB,**  
720 **Hammerschmidt R, Ausubel FM. 1997.** Phytoalexin-deficient mutants of arabidopsis  
721 reveal that *pad4* encodes a regulatory factor and that four *pad* genes contribute to  
722 downy mildew resistance. *Genetics* **146**(1): 381-392.
- 723 **Glinski M, Romeis T, Witte CP, Wienkoop S, Weckwerth W. 2003.** Stable isotope labeling  
724 of phosphopeptides for multiparallel kinase target analysis and identification of  
725 phosphorylation sites. *Rapid Commun Mass Spectrom* **17**(14): 1579-1584.
- 726 **Gruner K, Griebel T, Navarova H, Attaran E, Zeier J. 2013.** Reprogramming of plants  
727 during systemic acquired resistance. *Front Plant Sci* **4**: 252.
- 728 **Hake K, Romeis T. 2018.** Protein kinase-mediated signalling in priming: Immune signal  
729 initiation, propagation, and establishment of long-term pathogen resistance in plants.  
730 *Plant Cell Environ* 10.1111/pce.13429.
- 731 **Hartmann M, Kim D, Bernsdorff F, Ajami-Rashidi Z, Scholten N, Schreiber S, Zeier T,**  
732 **Schuck S, Reichel-Deland V, Zeier J. 2017.** Biochemical principles and functional  
733 aspects of pipecolic acid biosynthesis in plant immunity. *Plant Physiol* **174**(1): 124-153.
- 734 **Hartmann M, Zeier T, Bernsdorff F, Reichel-Deland V, Kim D, Hohmann M, Scholten N,**  
735 **Schuck S, Brautigam A, Holzel T, et al. 2018.** Flavin monooxygenase-generated n-  
736 hydroxypipicolinic acid is a critical element of plant systemic immunity. *Cell* **173**: 456-  
737 469.
- 738 **Hilker M, Schwachtje J, Baier M, Balazadeh S, Baurle I, Geiselhardt S, Hinch DK,**  
739 **Kunze R, Mueller-Roeber B, Rillig MC, et al. 2015.** Priming and memory of stress  
740 responses in organisms lacking a nervous system. *Biol Rev Camb Philos Soc* **20**(10):  
741 12215.
- 742 **Kadota Y, Sklenar J, Derbyshire P, Stransfeld L, Asai S, Ntoukakis V, Jones JD,**  
743 **Shirasu K, Menke F, Jones A, et al. 2014.** Direct regulation of the nadph oxidase  
744 rbohD by the prr-associated kinase bik1 during plant immunity. *Mol Cell* **54**(1): 43-55.
- 745 **Kobayashi M, Ohura I, Kawakita K, Yokota N, Fujiwara M, Shimamoto K, Doke N,**  
746 **Yoshioka H. 2007.** Calcium-dependent protein kinases regulate the production of  
747 reactive oxygen species by potato nadph oxidase. *Plant Cell* **19**(3): 1065-1080.

- 748 **Kobayashi M, Yoshioka M, Asai S, Nomura H, Kuchimura K, Mori H, Doke N, Yoshioka**  
749 **H. 2012.** *Stcdpk5 confers resistance to late blight pathogen but increases*  
750 *susceptibility to early blight pathogen in potato via reactive oxygen species burst.*  
751 *New Phytol* **196**(1): 223-237.
- 752 **Liese A, Romeis T. 2013.** Biochemical regulation of *in vivo* function of plant calcium-  
753 dependent protein kinases (cdpk). *Biochim Biophys Acta* **1833**(7): 1582-1589.
- 754 **Liu N, Hake K, Wang W, Zhao T, Romeis T, Tang D. 2017.** Calcium-dependent protein  
755 kinase5 associates with the truncated nlr protein tir-nbs2 to contribute to *exo70b1*-  
756 mediated immunity. *Plant Cell* **29**(4): 746-759.
- 757 **Manohar M, Tian M, Moreau M, Park SW, Choi HW, Fei Z, Friso G, Asif M, Manosalva P,**  
758 **von Dahl CC, et al. 2015.** Identification of multiple salicylic acid-binding proteins  
759 using two high throughput screens. *Front Plant Sci* **5**(777).
- 760 **Martinez-Medina A, Flors V, Heil M, Mauch-Mani B, Pieterse CMJ, Pozo MJ, Ton J, van**  
761 **Dam NM, Conrath U. 2016.** Recognizing plant defense priming. *Trends Plant Sci*  
762 **21**(10): 818-822.
- 763 **Mishina TE, Zeier J. 2006.** The arabidopsis flavin-dependent monooxygenase *fmo1* is an  
764 essential component of biologically induced systemic acquired resistance. *Plant*  
765 *Physiol* **141**(4): 1666-1675.
- 766 **Monaghan J, Matschi S, Romeis T, Zipfel C. 2015.** The calcium-dependent protein kinase  
767 *cpk28* negatively regulates the *bik1*-mediated pamp-induced calcium burst. *Plant*  
768 *Signal Behav* **10**(5): e1018497.
- 769 **Monaghan J, Matschi S, Shorinola O, Rovenich H, Matei A, Segonzac C, Malinovsky**  
770 **FG, Rathjen JP, MacLean D, Romeis T, et al. 2014.** The calcium-dependent protein  
771 kinase *cpk28* buffers plant immunity and regulates *bik1* turnover. *Cell Host Microbe*  
772 **16**(5): 605-615.
- 773 **Mori IC, Murata Y, Yang Y, Munemasa S, Wang YF, Andreoli S, Tiriac H, Alonso JM,**  
774 **Harper JF, Ecker JR, et al. 2006.** Cdpks *cpk6* and *cpk3* function in *aba* regulation of  
775 guard cell *s*-type anion- and  $ca^{2+}$ -permeable channels and stomatal closure. *PLoS*  
776 *Biol* **4**(10): e327.
- 777 **Návarová H, Bernsdorff F, Doring AC, Zeier J. 2012.** Pipecolic acid, an endogenous  
778 mediator of defense amplification and priming, is a critical regulator of inducible plant  
779 immunity. *Plant Cell* **24**(12): 5123-5141.
- 780 **Reimer-Michalski EM, Conrath U. 2016.** Innate immune memory in plants. *Semin Immunol*  
781 **28**(4): 319-327.
- 782 **Rietz S, Stamm A, Malonek S, Wagner S, Becker D, Medina-Escobar N, Vlot AC, Feys**  
783 **BJ, Niefind K, Parker JE. 2011.** Different roles of enhanced disease susceptibility1

- 784 (eds1) bound to and dissociated from phytoalexin deficient4 (pad4) in arabidopsis  
785 immunity. *New Phytol* **191**(1): 107-119.
- 786 **Romeis T, Piedras P, Jones JD. 2000.** Resistance gene-dependent activation of a calcium-  
787 dependent protein kinase in the plant defense response. *Plant Cell* **12**(5): 803-816.
- 788 **Schulz P, Herde M, Romeis T. 2013.** Calcium-dependent protein kinases: Hubs in plant  
789 stress signaling and development. *Plant Physiol* **163**(2): 523-530.
- 790 **Serrano M, Wang B, Aryal B, Garcion C, Abou-Mansour E, Heck S, Geisler M, Mauch F,  
791 Nawrath C, Metraux JP. 2013.** Export of salicylic acid from the chloroplast requires  
792 the multidrug and toxin extrusion-like transporter eds5. *Plant Physiol* **162**(4): 1815-  
793 1821.
- 794 **Seybold H, Trempel F, Ranf S, Scheel D, Romeis T, Lee J. 2014.** Ca<sup>2+</sup> signalling in plant  
795 immune response: From pattern recognition receptors to ca<sup>2+</sup> decoding mechanisms.  
796 *New Phytol* **204**(4): 782-790.
- 797 **Shah J, Zeier J. 2013.** Long-distance communication and signal amplification in systemic  
798 acquired resistance. *Front Plant Sci* **4**: 30.
- 799 **Stael S, Wurzinger B, Mair A, Mehlmer N, Vothknecht UC, Teige M. 2012.** Plant  
800 organellar calcium signalling: An emerging field. *J Exp Bot* **63**(4): 1525-1542.
- 801 **Sun T, Busta L, Zhang Q, Ding P, Jetter R, Zhang Y. 2018.** Tgacg-binding factor 1 (tga1)  
802 and tga4 regulate salicylic acid and pipelicolic acid biosynthesis by modulating the  
803 expression of *systemic acquired resistance deficient 1 (sard1)* and *calmodulin-binding*  
804 *protein 60g (cbp60g)*. *New Phytol* **217**(1): 344-354.
- 805 **Sun T, Zhang Y, Li Y, Zhang Q, Ding Y, Zhang Y. 2015.** Chip-seq reveals broad roles of  
806 sard1 and cbp60g in regulating plant immunity. *Nat Commun* **6**: 10159.
- 807 **Truman W, Glazebrook J. 2012.** Co-expression analysis identifies putative targets for  
808 cbp60g and sard1 regulation. *BMC Plant Biol* **12**: 216.
- 809 **Wang J, Grubb LE, Wang J, Liang X, Li L, Gao C, Ma M, Feng F, Li M, Li L, et al. 2018.** A  
810 regulatory module controlling homeostasis of a plant immune kinase. *Mol Cell* **69**(3):  
811 493-504 e496.
- 812 **Wang L, Tsuda K, Sato M, Cohen JD, Katagiri F, Glazebrook J. 2009.** Arabidopsis cam  
813 binding protein cbp60g contributes to mamp-induced sa accumulation and is involved  
814 in disease resistance against *pseudomonas syringae*. *PLoS Pathog* **5**(2): e1000301.
- 815 **Wang L, Tsuda K, Truman W, Sato M, Nguyen le V, Katagiri F, Glazebrook J. 2011.**  
816 Cbp60g and sard1 play partially redundant critical roles in salicylic acid signaling.  
817 *Plant J* **67**(6): 1029-1041.
- 818 **Wang Y, Schuck S, Wu J, Yang P, Doring AC, Zeier J, Tsuda K. 2018.** A mpk3/6-wrky33-  
819 ald1-pipelicolic acid regulatory loop contributes to systemic acquired resistance. *Plant*  
820 *Cell* **30**(10): 2480-2494.

- 821 **Wiermer M, Feys BJ, Parker JE. 2005.** Plant immunity: The eds1 regulatory node. *Curr*  
822 *Opin Plant Biol* **8**(4): 383-389.
- 823 **Wildermuth MC, Dewdney J, Wu G, Ausubel FM. 2001.** Isochorismate synthase is  
824 required to synthesize salicylic acid for plant defence. *Nature* **414**(6863): 562-565.
- 825 **Wu Y, Zhang D, Chu JY, Boyle P, Wang Y, Brindle ID, De Luca V, Despres C. 2012.** The  
826 arabidopsis npr1 protein is a receptor for the plant defense hormone salicylic acid.  
827 *Cell Rep* **1**(6): 639-647.
- 828 **Yan S, Dong X. 2014.** Perception of the plant immune signal salicylic acid. *Curr Opin Plant*  
829 *Biol* **20**: 64-68.
- 830 **Ye W, Muroyama D, Munemasa S, Nakamura Y, Mori IC, Murata Y. 2013.** Calcium-  
831 dependent protein kinase cpk6 positively functions in induction by yeast elicitor of  
832 stomatal closure and inhibition by yeast elicitor of light-induced stomatal opening in  
833 arabidopsis. *Plant Physiol* **163**(2): 591-599.
- 834 **Zhang Y, Xu S, Ding P, Wang D, Cheng YT, He J, Gao M, Xu F, Li Y, Zhu Z, et al. 2010.**  
835 Control of salicylic acid synthesis and systemic acquired resistance by two members  
836 of a plant-specific family of transcription factors. *Proc Natl Acad Sci U S A* **107**(42):  
837 18220-18225.
- 838 **Zheng XY, Zhou M, Yoo H, Pruneda-Paz JL, Spivey NW, Kay SA, Dong X. 2015.** Spatial  
839 and temporal regulation of biosynthesis of the plant immune signal salicylic acid. *Proc*  
840 *Natl Acad Sci U S A* **112**(30): 9166-9173.
- 841 **Zhou M, Lu Y, Bethke G, Harrison BT, Hatsugai N, Katagiri F, Glazebrook J. 2018.**  
842 Wrky70 prevents axenic activation of plant immunity by direct repression of sard1.  
843 *New Phytol* **217**(2): 700-712.

844

#### 845 Supporting Information

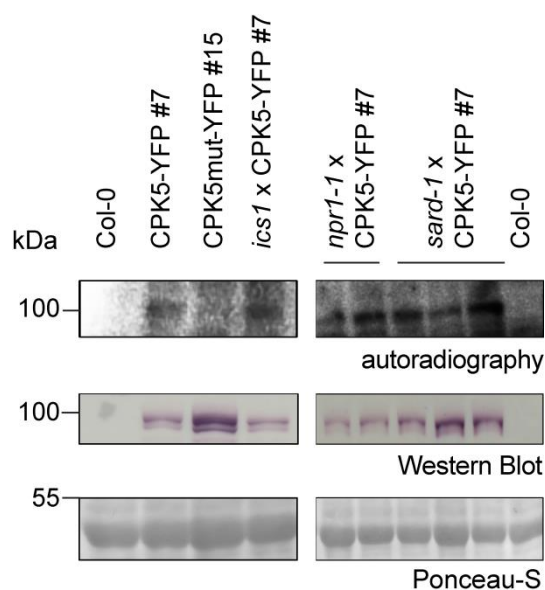

846

847 **Fig. S1 CPK5-YFP is expressed and retains constitutive protein kinase activity in**  
848 **crossed lines.** Total protein of two-week-old seedlings of Col-0, CPK5-YFP #7, CPK5mut-  
849 YFP # 15, and derived *Arabidopsis* crossing lines as indicated were separated by SDS-  
850 PAGE and subjected to an in-gel kinase assay using myelin basic proteins as a substrate or  
851 to immunoblotting. Proteins were visualized by autoradiography (upper panel) or analyzed by  
852 immunostaining with  $\alpha$ -YFP (middle panel). The amount of protein was visualized by  
853 Ponceau-S staining (lower panel).

854

855

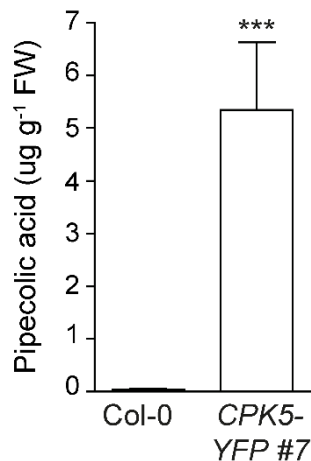

856

857 **Fig. S2 Overexpression of CPK5 results in the accumulation of pipecolic acid.** Eight  
858 pools of five plants of Col-0 and *CPK5-YFP #7* were analyzed for their pipecolic acid  
859 contents using the EZ:faast protocol for extraction and GC-MS analysis. The asterisk  
860 indicates statistically significant differences in comparison to Col-0 (student's t-test, \*\*\*  
861  $P < 0.001$ ).

862

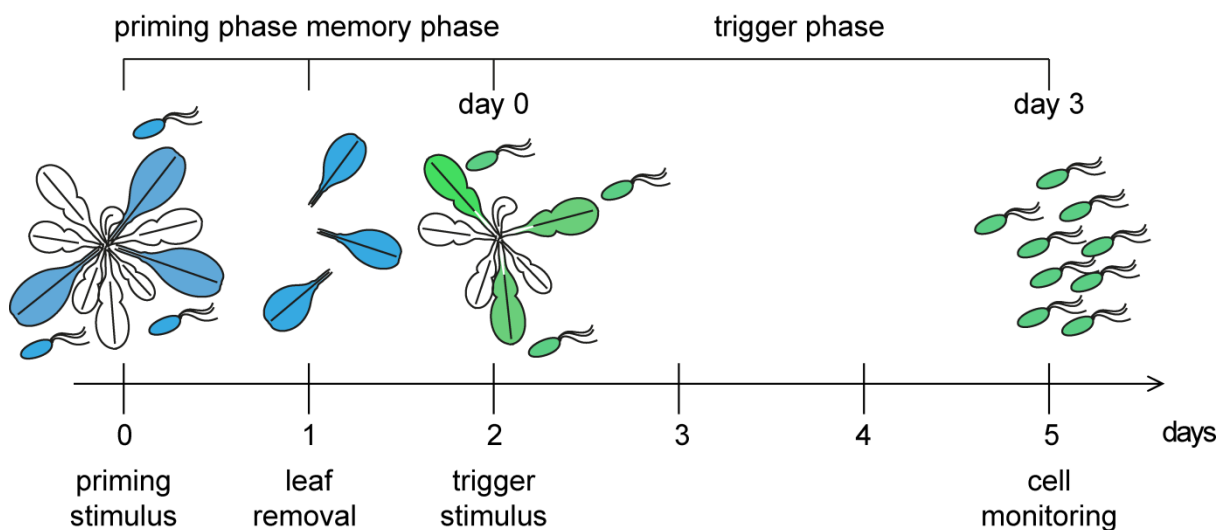

863

864 **Fig. S3 Experimental outline to assess temporal and spatial distinct responses**  
865 **required for priming of SAR.** Plants are subjected to a primary stimulation (*priming*

866 *stimulus*) by treatment with 200 nM flg22 or infection with avirulent *Psm* ES 4326 *avrRpm1*  
867 and a control (infiltration of 10 mM MgCl<sub>2</sub> as mock treatment) on three fully developed lower  
868 leaves (shown in blue). After 24 h these leaves were removed. After two days, three  
869 subsequent systemic leaves (shown in green) were subjected to a secondary stimulation  
870 (*triggering stimulus*) by infection with virulent *Psm* ES 4326 and the corresponding equality of  
871 infiltration events was monitored (corresponds to 0 dpi of cell monitoring). After five days,  
872 comparing to 3 dpi after the triggering stimulation, bacterial growth of virulent *Psm* ES 4326  
873 was monitored.  
874

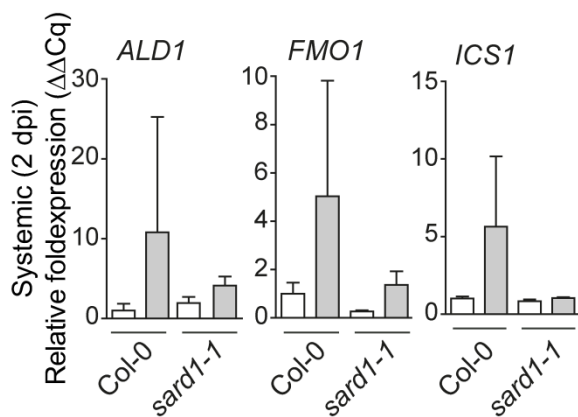

875  
876 **Fig. S4 Systemic defense gene expression at two dpi is reduced in *sard1-1*.** Three local  
877 leaves of six-week-old plants of Col-0 and *sard1-1* were infiltrated with 10 mM MgCl<sub>2</sub>  
878 (mock/white bars) or 200 nM flg22 (grey bars). After two days, three systemic leaves were  
879 harvested and gene expression was analyzed by qRT-PCR. Bars represent mean value ±  
880 SEM of three biological replicates.  
881

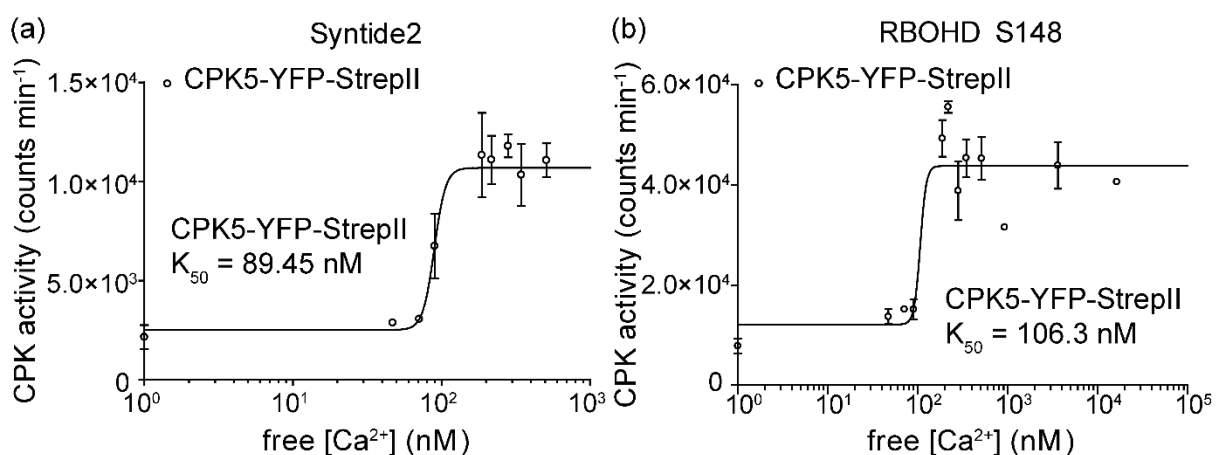

882  
883 **Fig. S5 Ca<sup>2+</sup>-dependent protein kinase activity of CPK5-YFP-StrepII.** Kinase activity of  
884 affinity-purified recombinant protein CPK5-YFP-StrepII (25 nM) was analyzed in an *in vitro*  
885 kinase assay toward 10 μM substrate peptide Syntide 2 (a) and RBOHD S148 (10 aa peptide  
886 encompassing S148) (b), respectively, for 20 min in a series of increasing Ca<sup>2+</sup>  
887 concentrations as indicated and K50 was determined. Data represent mean value ± SEM of



888 two technical replicates. The experiment was repeated with similar results.

889

890 **Table S1 Primers used for genotyping of T-DNA insertion lines and cloning.**

| mutant/<br>overexpressor               | LP (5'-3')                           | RP (5'-3')                                  |
|----------------------------------------|--------------------------------------|---------------------------------------------|
| <i>cpk5</i>                            | GTTCTTCATCAAAGGAACTG                 | TGCTTGTGTACGTGGAGGTG                        |
| <i>cpk6</i>                            | CTCGCAACTAACGCTTACCTG                | CTCCATTTTCATCGTCTTCTCG                      |
| <i>ics1</i>                            | AGTGACTGTATTTGATCGCCG                | TTTACGAATTTCTGCAATGGC                       |
| <i>pad4</i>                            | TGCGATGCATCAGAAGAGCAGC               | TGCGTCACTCTCATCAACAACCA                     |
| <i>eds5</i>                            | CGCTGCACCTGTTTTTATCTC                | TTCTCCACCGTGTATGGACTC                       |
| <i>edr1</i>                            | CACAGGCAATGAGGATGATG                 | ACATTGTCTCTGCCATGCAC                        |
| <i>sard1-1</i>                         | ACCCTTCGTTCTGTCTAGAGC                | TGACCGAGATAATCGAAATCG                       |
| <i>ald1</i>                            | TTACGATGCATTTGCTATGACC               | TTTTAAATGGAACGCAAGGAG                       |
| <i>fmo1-1</i>                          | AGCGTGCCGTAGTTTCCAAGTT<br>CA         | CCAAGGATTGAGTCCCATGTCT<br>T                 |
| CPK6-YFP<br>genotyping                 | CCGCCATGCCCGAAGGCTAC                 | ACCTCGGC GCGGGTCTTGTA                       |
| CPK6-YFP<br>cloning                    | CACCATGGGCAATTCATGTCGT<br>G          | CACATCTCTCATGCTGATGTTTA<br>G                |
| CPK5-Strep/YFP<br>cloning in<br>pET30a | CAATTGATGAGCTACAACAAGC<br>GTGT       | GAGGATGAGACCTACCGGCGG<br>CCTTGACAGCTCGTCCAT |
| CPK6-Strep<br>cloning in<br>pET30a     | TAAGCCCATATGATGGGCAATT<br>CATGTCTGGT | GGCTTACTCGAGTTATTTTTCAA<br>ATTGAGGATGAGACCA |

891

892 **Table S2 Primers used for RT-qPCR analysis.**

| Gene                   | Oligonucleotide sequence (5'-3') |
|------------------------|----------------------------------|
| q-Actin2-F (At3g18780) | TCCCTCAGCACATTCCAGCAGAT          |
| q-Actin2-R (At3g18780) | AACGATTCCTGGACCTGCCTCATC         |
| q-ALD1-F (AT2G13810)   | GTGCAAGATCCTACCTTCCCGGC          |
| q-ALD1-R (AT2G13810)   | CGGTCCTTGGGGTCATAGCCAGA          |
| q-FMO1-F (AT1G19250)   | CTTTCCGAACCTGGCTTGAG             |
| q-FMO1-R (AT1G19250)   | AAGTTCGAGCTGCTTTGGAC             |
| q-FRK1-F (At2g19190)   | CGGTCAGATTTCAACAGTTGTC           |
| q-FRK1-R (At2g19190)   | AATAGCAGGTTGGCCTGTAATC           |

|                          |                        |
|--------------------------|------------------------|
| q-GAPDH-3'-F (At1g13440) | TTGGTGACAACAGGTCAAGCA  |
| q-GAPDH-3'-R (At1g13440) | AAACTTGTCGCTCAATGCAATC |
| q-GAPDH-5'-F (At1g13440) | TCTCGATCTCAATTCGCAAAA  |
| q-GAPDH-5'-R (At1g13440) | CGAAACCGTTGATTCCGATTC  |
| q-ICS1-F (At1g74710)     | TTCTCAATTGGCAGGGAGAC   |
| q-ICS1-R (At1g74710)     | AAGCCTTGCTTCTTCTGCTG   |
| q-Intron-F (At5g65080)   | TTTTTTGCCCCCTTCGAATC   |
| q-Intron-R (At5g65080)   | ATCTTCCGCCACCACATTGTAC |
| q-NHL10-F (At2g35980)    | TTCCTGTCCGTAACCCAAAC   |
| q-NHL10-R (At2g35980)    | CCCTCGTAGTAGGCATGAGC   |
| q-PR1-F (At2g14610)      | CATGGGACCTACGCCTACC    |
| q-PR1-R (At2g14610)      | TTCTTCCCTCGAAAGCTCAA   |
| q-SARD-F                 | TAGTGGCTCGCAGCATATTG   |
| q-SARD-R                 | AAGAAGAATTGTCCGAGAGGAG |

893
